# Supplementary material for: Visible light-induced metal-free cascade denitrogenative borylation and iodination of nitroarenes
Source: Royal Society of Chemistry journal article supplement (doi:10.1039/d4ob00309h), 2024-01-01
Supplement: d4ob00309h1.pdf [file d4ob00309h1.pdf]

## Supporting Information

# Visible Light-induced Metal-free Cascade Denitrogenative Borylation and Iodination of Nitroarenes

Jun-Wei Li<sup>†a</sup>, Tian-Shun Duan<sup>†a</sup>, Bing Sun<sup>a</sup>, Fang-Lin Zhang<sup>\*a</sup>

<sup>a</sup>School of Chemistry, Chemical Engineering and Life Sciences, Wuhan University of Technology,  
Wuhan 430070, P. R. China. \*Emails: [fanglinzhang@whut.edu.cn](mailto:fanglinzhang@whut.edu.cn)

## Contents

|                                            |     |
|--------------------------------------------|-----|
| 1. General Information.....                | S2  |
| 2. Borylation Reaction Conditions.....     | S3  |
| 3. Iodization Reaction Conditions.....     | S6  |
| 4. Plausible Pathway for the Reaction..... | S15 |
| 5. NMR Spectra.....                        | S16 |
| 6. References.....                         | S46 |

## 1. General Information

**General Methods.** All reagents were bought from commercial sources and used as received without further purification. All reactions were carried out under  $N_2$  atmosphere unless otherwise noted. Analytical thin layer chromatography was performed on 0.25 mm silica gel 60-F254. Visualization was carried out with UV light.  $^1H$  NMR was recorded on Bruker instrument (500 MHz). Chemical shifts were quoted in parts per million (ppm) referenced to 0.0 ppm for tetramethylsilane. The following abbreviations (or combinations thereof) were used to explain multiplicities: s = singlet, d = doublet, t = triplet, q = quartet, m = multiplet, br = broad. Coupling constants,  $J$ , were reported in Hertz unit (Hz).  $^{13}C$  NMR spectra were recorded on Bruker instrument (126 MHz), and were fully decoupled by broad band proton decoupling. Chemical shifts were reported in ppm referenced to either the center line of a triplet at 77.0 ppm of chloroform- $d$  or referenced to the center line of a septet at 39.52 ppm of DMSO- $d_6$ . High-resolution mass spectra (HRMS) were recorded on an Agilent Mass spectrometer using ESI-TOF (electrospray ionization-time of flight).

**General Instrumental Data.** The photoreactors used in this research were bought from GeAo Chem and KeTai Chem: 10 W for every light bulb; every glass vessel was irradiated by 2 light bulbs from the side.

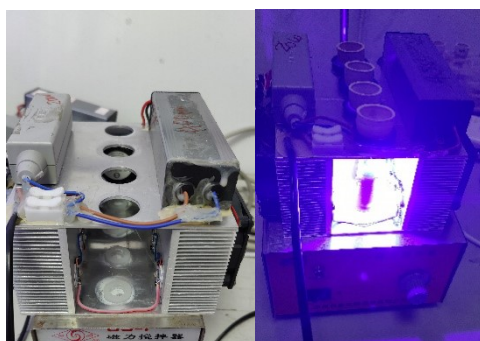

Figure S1. Experimental Apparatus

## 2. Borylation Reaction Conditions

### 2.1 Screening of Solvent

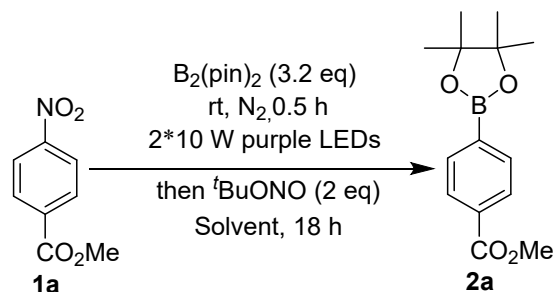

| Entry | Solvent                               | Yield <b>2a</b> (%) <sup>b</sup> |
|-------|---------------------------------------|----------------------------------|
| 1     | MeOH                                  | 28                               |
| 2     | EtOH                                  | 33                               |
| 3     | <i>i</i> PrOH                         | 55                               |
| 4     | 1-butanol                             | 20                               |
| 5     | THF                                   | 15                               |
| 6     | 1,4-dioxane                           | 17                               |
| 7     | CH <sub>3</sub> CN                    | 10                               |
| 8     | DMF                                   | N.D                              |
| 9     | Toluene                               | 6                                |
| 10    | <i>i</i> PrOH/1,4-dioxane(1/1)        | 59                               |
| 11    | <i>i</i> PrOH/THF(1/1)                | 50                               |
| 12    | <i>i</i> PrOH/CH <sub>3</sub> CN(1/1) | 56                               |

**Table S1:** Screening of solvent. <sup>a</sup>Reaction conditions: **1a** (0.3 mmol, 1.0 eq),  $B_2(\text{pin})_2$  (3.2 eq) in solvent (3 mL, 0.1 M) stirred under 2 x 10 W purple LEDs at rt for 0.5 h. Then  $t\text{-BuONO}$  (2.0 eq) was added and stirred for 18 h. <sup>b</sup>Isolated yields.

## 2.2 Screening of light source

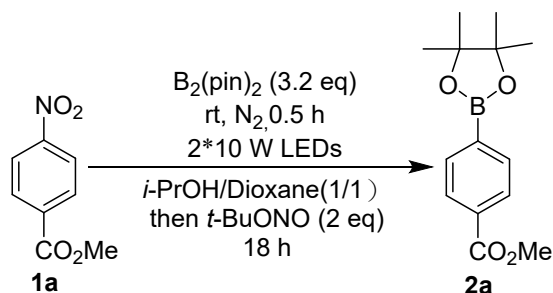

| Entry | Light source       | Yield <b>2a</b> (%) <sup>b</sup> |
|-------|--------------------|----------------------------------|
| 1     | 2×10 W purple LEDs | 59                               |
| 2     | 2×10 W blue LEDs   | 8                                |
| 3     | Dark               | N.R.                             |

**Table S2:** Screening of light source. <sup>a</sup>Reaction conditions: **1a** (0.3 mmol, 1.0 eq),  $B_2(\text{pin})_2$  (3.2 eq) in *i*-PrOH/1,4-dioxane (3 mL, 1/1) stirred under 2 x 10 W LEDs at rt for 0.5 h. Then *t*-BuONO (2.0 eq) was added and stirred for 18 h. <sup>b</sup>Isolated yields.

## 2.3 Screening of acid

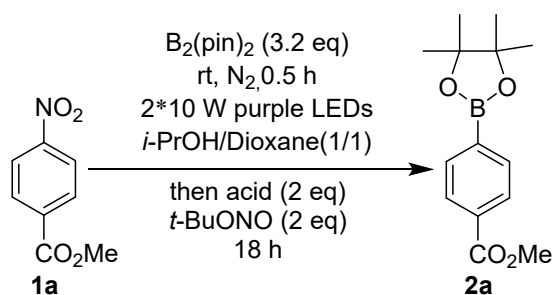

| Entry | Acid                             | Yield <b>2a</b> (%) <sup>b</sup> |
|-------|----------------------------------|----------------------------------|
| 1     | $\text{HBF}_4$                   | 64                               |
| 2     | $\text{CH}_3\text{COOH}$         | 60                               |
| 3     | MsOH                             | 70                               |
| 5     | $\text{CF}_3\text{SO}_3\text{H}$ | 67                               |
| 6     | HCl                              | 58                               |

**Table S3:** Screening of acid. <sup>a</sup>Reaction conditions: **1a** (0.3 mmol, 1.0 eq),  $B_2(\text{pin})_2$  (3.2 eq) in *i*-PrOH/1,4-dioxane (3 mL, 1/1) stirred under 2 x 10 W purple LEDs at rt for 0.5

h. Then *t*-BuONO (2.0 eq) and acid (2.0 eq) was added and stirred for 18 h. <sup>b</sup>Isolated yields.

## 2.4 Screening of additive

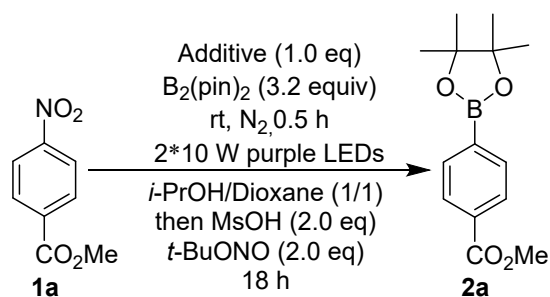

| Entry | Additive          | Yield <b>2a</b> (%) <sup>b</sup> |
|-------|-------------------|----------------------------------|
| 1     | NaBF <sub>4</sub> | 75                               |
| 2     | NaF               | 70                               |
| 3     | KF                | 68                               |
| 4     | AgF               | 60                               |

**Table S4:** Screening of additive. <sup>a</sup>Reaction conditions: **1a** (0.3 mmol, 1.0 eq), B<sub>2</sub>(pin)<sub>2</sub> (3.2 eq) and additive (1.0 eq) in *i*-PrOH/1,4-dioxane (3 mL, 1/1) stirred under 2 x 10 W purple LEDs at rt for 0.5 h. Then *t*-BuONO (2.0 eq) and MsOH (2.0 eq) was added and stirred for 18 h. <sup>b</sup>Isolated yields.

## 2.5 General procedure for the synthesis of 2a – 2d

A sealed tube with magnetic stir bar was charged with **1** (0.3 mmol, 1.0 eq), Bis(pinacolato)diboron (0.96 mmol, 3.2 eq), NaBF<sub>4</sub> (0.3 mmol, 1.0 eq) in nitrogen atmosphere, followed by *i*-PrOH/1,4-Dioxane (1/1, 3 mL). MsOH (0.6 mmol, 2.0 eq) and *t*-BuONO (0.6 mmol, 2.0 eq) were added to the reaction solution half an hour after irradiation by the photoreaction device (380 nm light). The mixture was stirred until complete conversion of the **2** (monitored by TLC). The product was purified on silica gel (petroleum ether/ethyl acetate, gradient from 40:1 to 10:1).

## 2.6 Characterization of products

**Methyl 4-(4,4,5,5-tetramethyl-1,3,2-dioxaborolan-2-yl)benzoate (2a)**

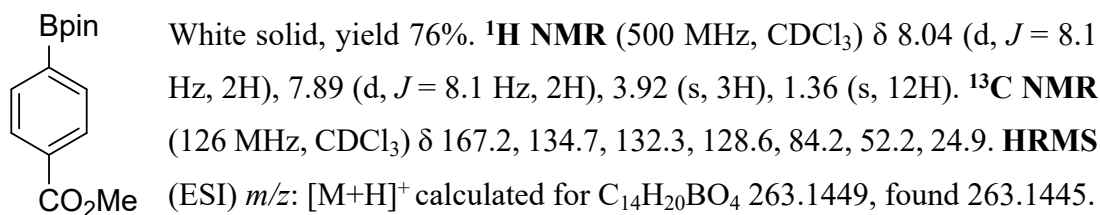

### 1-(4-(4,4,5,5-tetramethyl-1,3,2-dioxaborolan-2-yl)phenyl)ethan-1-one (2b)

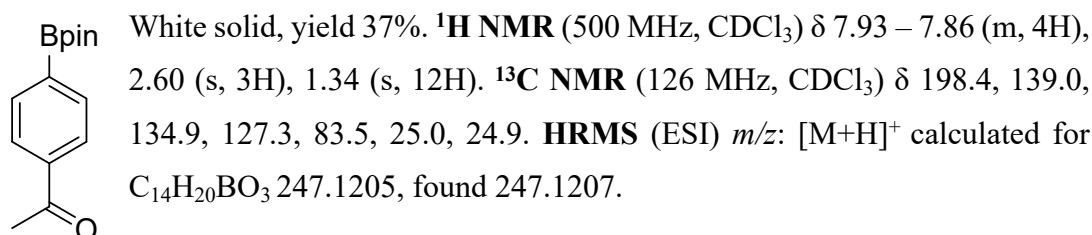

### 4,4,5,5-tetramethyl-2-(p-tolyl)-1,3,2-dioxaborolane (2c)

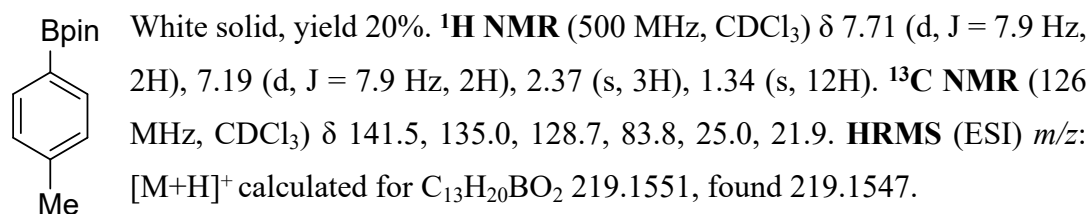

### 2-(4-methoxyphenyl)-4,4,5,5-tetramethyl-1,3,2-dioxaborolane (2d)

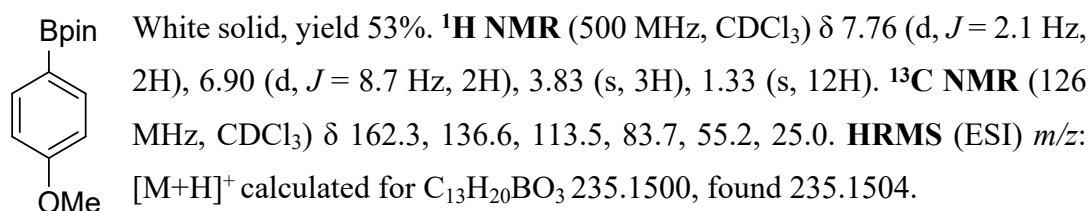

## 3. Iodization Reaction Conditions

### 3.1 Screening of iodizing reagent

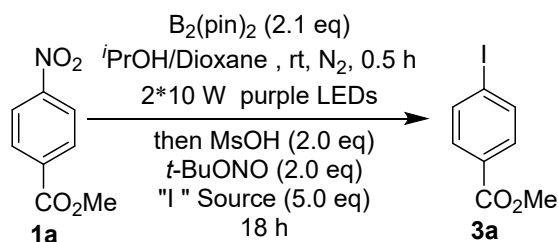

| Entry | Iodizing reagent        | Yield <b>3a</b> (%) <sup>b</sup> |
|-------|-------------------------|----------------------------------|
| 1     | NIS                     | 46                               |
| 2     | $\text{CH}_2\text{I}_2$ | 72                               |
| 3     | NaI                     | 34                               |
| 4     | $\text{NH}_4\text{I}$   | 28                               |

**Table S5:** Screening of iodizing reagent. <sup>a</sup>Reaction conditions: **1a** (0.3 mmol, 1.0 eq),  $B_2(\text{pin})_2$  (2.1 eq) in  $i\text{PrOH}/1,4\text{-dioxane}$  (3 mL, 1/1) stirred under 2 x 10 W purple LEDs at rt for 0.5 h. Then  $t\text{-BuONO}$  (2.0 eq), Iodizing reagent (5.0 eq) and  $\text{MsOH}$  (2.0 eq) was added and stirred for 18 h. <sup>b</sup>Isolated yields.

### 3.2 Screening of acid

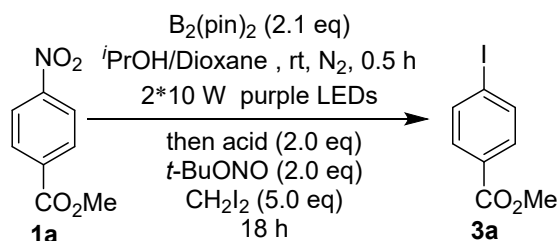

| Entry | Acid                             | Yield <b>6a</b> (%) <sup>b</sup> |
|-------|----------------------------------|----------------------------------|
| 1     | $\text{HBF}_4$                   | 77                               |
| 2     | $\text{CH}_3\text{COOH}$         | 70                               |
| 3     | $\text{CH}_3\text{SO}_3\text{H}$ | 72                               |
| 4     | $\text{CF}_3\text{SO}_3\text{H}$ | 70                               |

**Table S6:** Screening of acid. <sup>a</sup>Reaction conditions: **1a** (0.3 mmol, 1.0 eq),  $B_2(\text{pin})_2$  (2.1 eq) in  $i\text{PrOH}/1,4\text{-dioxane}$  (3 mL, 1/1) stirred under 2 x 10 W purple LEDs at rt for 0.5 h. Then  $t\text{-BuONO}$  (2.0 eq),  $\text{CH}_2\text{I}_2$  (5.0 eq) and acid (2.0 eq) was added and stirred for 18 h. <sup>b</sup>Isolated yields.

### 3.3 General procedure for the synthesis of 3a – 3r

A sealed tube with magnetic stir bar was charged with **1** (0.3 mmol, 1.0 eq), Bis(pinacolato)diboron (0.63 mmol, 2.1 eq), CH<sub>2</sub>I<sub>2</sub> (1.5 mmol, 5.0 eq) in nitrogen atmosphere, followed by *i*PrOH/1,4-dioxane (1/1, 2 mL). HBF<sub>4</sub> (0.6 mmol, 2.0 eq) and *t*-BuONO (0.6 mmol, 2.0 eq) were added to the reaction solution half an hour after irradiation by the photoreaction device (380 nm light). The mixture was stirred until complete conversion of the **3** (monitored by TLC). The product was purified on silica gel (petroleum ether/ethyl acetate, gradient from 40:1 to 10:1).

### 3.4 General procedure for the synthesis of 3s – 3u

A sealed tube with magnetic stir bar was charged with **1** (0.3 mmol, 1.0 eq), Bis(pinacolato)diboron (0.63 mmol, 2.1 eq), CCl<sub>3</sub>Br (1.5 mmol, 5.0 eq) in nitrogen atmosphere, followed by *i*PrOH/1,4-dioxane (1/1, 2 mL). HBF<sub>4</sub> (0.6 mmol, 2.0 eq) and *t*-BuONO (0.6 mmol, 2.0 eq) were added to the reaction solution half an hour after irradiation by the photoreaction device (380 nm light). The mixture was stirred until complete conversion of the **3** (monitored by TLC). The product was purified on silica gel (petroleum ether/ethyl acetate, gradient from 40:1 to 10:1).

### 3.5 Characterization of products

#### Methyl 4-iodobenzoate (**3a**)

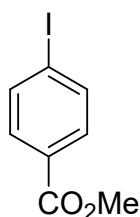

White solid, yield 77%. <sup>1</sup>H NMR (500 MHz, CDCl<sub>3</sub>) δ 7.80 (d, *J* = 8.6 Hz, 2H), 7.74 (d, *J* = 8.5 Hz, 2H), 3.91 (s, 3H). <sup>13</sup>C NMR (126 MHz, CDCl<sub>3</sub>) δ 166.7, 137.8, 131.1, 129.7, 100.7, 52.3. HRMS (ESI) *m/z*: [M+H]<sup>+</sup> calculated for C<sub>8</sub>H<sub>8</sub>IO<sub>2</sub> 292.9563, found 292.9568.

#### 4-iodobenzenesulfonamide (**3b**)

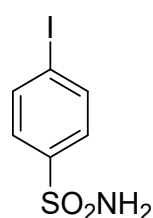

White solid, yield 90%. <sup>1</sup>H NMR (500 MHz, CDCl<sub>3</sub>) δ 7.93 (d, *J* = 8.5 Hz, 2H), 7.56 (d, *J* = 8.5 Hz, 2H), 7.40 (s, 2H). <sup>13</sup>C NMR (126 MHz, DMSO) δ 144.2, 138.3, 127.9, 99.9. HRMS (ESI) *m/z*: [M+H]<sup>+</sup> calculated for C<sub>6</sub>H<sub>7</sub>INO<sub>2</sub>S 283.9237, found 283.9239.



### N-(tert-butyl)-4-iodobenzenesulfonamide (3c)

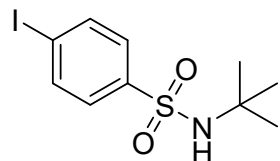

White solid, yield 65%.  $^1\text{H NMR}$  (500 MHz,  $\text{CDCl}_3$ )  $\delta$  7.95 (d,  $J = 8.5$  Hz, 2H), 7.60 (d,  $J = 2.8$  Hz, 2H), 7.58 (s, 1H), 1.09 (s, 9H).  $^{13}\text{C NMR}$  (126 MHz, DMSO)  $\delta$  144.5, 138.4, 128.5, 100.0, 53.9, 30.2. **HRMS** (ESI)  $m/z$ :  $[\text{M}+\text{H}]^+$  calculated for  $\text{C}_{10}\text{H}_{15}\text{INO}_2\text{S}$  339.9863, found 339.9867.

### 4-Iodoacetophenone (3d)

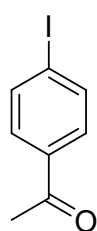

Yellow solid, yield 72%.  $^1\text{H NMR}$  (500 MHz,  $\text{CDCl}_3$ )  $\delta$  7.82 (d,  $J = 8.5$  Hz, 2H), 7.65 (d,  $J = 8.5$  Hz, 2H), 2.56 (s, 3H).  $^{13}\text{C NMR}$  (126 MHz,  $\text{CDCl}_3$ )  $\delta$  197.3, 137.9, 136.4, 129.7, 101.1, 26.5. **HRMS** (ESI)  $m/z$ :  $[\text{M}+\text{H}]^+$  calculated for  $\text{C}_8\text{H}_8\text{IO}$  246.9614, found 246.9612.

### 4-iodobenzonitrile (3e)

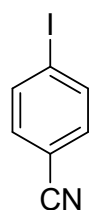

Yellow solid, yield 60%.  $^1\text{H NMR}$  (500 MHz,  $\text{CDCl}_3$ )  $\delta$  7.84 (d,  $J = 8.4$  Hz, 2H), 7.36 (d,  $J = 8.5$  Hz, 2H).  $^{13}\text{C NMR}$  (126 MHz,  $\text{CDCl}_3$ )  $\delta$  138.5, 133.2, 118.2, 111.8, 100.3. **HRMS** (ESI)  $m/z$ :  $[\text{M}+\text{H}]^+$  calculated for  $\text{C}_7\text{H}_5\text{IN}$  229.9461, found 229.9455.

### 4-Iodoanisole (3f)

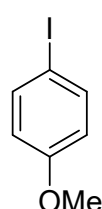

White solid, yield 56%.  $^1\text{H NMR}$  (500 MHz,  $\text{CDCl}_3$ )  $\delta$  7.56 (d,  $J = 8.8$  Hz, 2H), 6.68 (d,  $J = 8.9$  Hz, 2H), 3.78 (s, 3H).  $^{13}\text{C NMR}$  (126 MHz,  $\text{CDCl}_3$ )  $\delta$  159.5, 138.2, 116.4, 82.7, 55.3. **HRMS** (ESI)  $m/z$ :  $[\text{M}+\text{H}]^+$  calculated for  $\text{C}_7\text{H}_8\text{IO}$  234.9614, found 234.9618.

### 3-iodo-1,1'-biphenyl (3g)

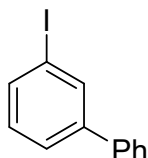

White solid, yield 21%.  $^1\text{H NMR}$  (500 MHz,  $\text{CDCl}_3$ )  $\delta$  7.95 (s, 1H), 7.68 (d,  $J = 7.9$  Hz, 1H), 7.55 (d,  $J = 7.2$  Hz, 3H), 7.45 (t,  $J = 7.5$  Hz, 2H), 7.38 (d,  $J = 7.3$  Hz, 1H), 7.18 (t,  $J = 7.8$  Hz, 1H).  $^{13}\text{C NMR}$  (126 MHz,  $\text{CDCl}_3$ )  $\delta$  143.5, 140.0, 136.2, 136.2, 130.4, 128.9, 127.9, 127.1, 126.4, 94.8.

**HRMS** (ESI)  $m/z$ :  $[\text{M}+\text{H}]^+$  calculated for  $\text{C}_{12}\text{H}_{10}\text{I}$  280.9822, found 280.9823.

### 1-(3-iodophenyl)ethan-1-one (3h)

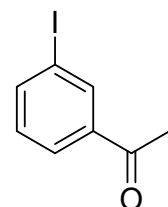

Yellow oil, yield 41%.  $^1\text{H NMR}$  (500 MHz,  $\text{CDCl}_3$ )  $\delta$  8.24 (s, 1H), 7.90 – 7.83 (m, 2H), 7.18 (t,  $J = 7.9$  Hz, 1H), 2.55 (s, 3H).  $^{13}\text{C NMR}$  (126

MHz, DMSO)  $\delta$  191.8, 137.1, 134.0, 132.5, 125.6, 122.7, 89.7, 21.8. **HRMS (ESI)  $m/z$ :**  $[M+H]^+$  calculated for  $C_8H_8IO$  246.9614, found 246.9618.

### Methyl 3-iodobenzoate (3i)

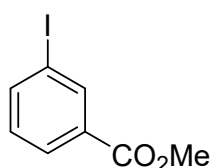

White solid, yield 56%.  **$^1H$  NMR** (500 MHz,  $CDCl_3$ )  $\delta$  8.37 (s, 1H), 7.99 (d,  $J = 7.9$  Hz, 1H), 7.87 (d,  $J = 7.8$  Hz, 1H), 7.17 (t,  $J = 7.8$  Hz, 1H), 3.91 (s, 3H).  **$^{13}C$  NMR** (126 MHz,  $CDCl_3$ )  $\delta$  165.6, 141.7, 138.5, 132.0, 130.1, 128.7, 93.8, 52.4. **HRMS (ESI)  $m/z$ :**  $[M+H]^+$

calculated for  $C_8H_8IO_2$  262.9563, found 262.9567.

### 3-iodobenzenesulfonamide (3j)

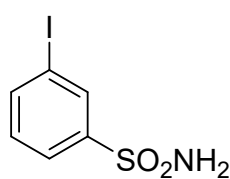

White solid, yield 66%.  **$^1H$  NMR** (500 MHz,  $CDCl_3$ )  $\delta$  8.15 (s, 1H), 7.97 (d,  $J = 7.9$  Hz, 1H), 7.83 (d,  $J = 7.9$  Hz, 1H), 7.46 (s, 2H), 7.38 (t,  $J = 7.8$  Hz, 1H).  **$^{13}C$  NMR** (126 MHz, DMSO)  $\delta$  146.3, 140.8, 134.4, 131.6, 125.3, 95.3. **HRMS (ESI)  $m/z$ :**  $[M+H]^+$

calculated for  $C_6H_7INO_2S$  282.9237, found 282.9235.

### 4-iodo-2-methoxybenzonitrile (3k)

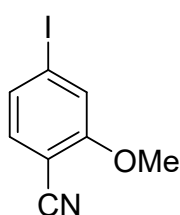

White solid, yield 53%.  **$^1H$  NMR** (500 MHz,  $CDCl_3$ )  $\delta$  7.79 (d,  $J = 2.0$  Hz, 1H), 7.78 (d,  $J = 3.1$  Hz, 1H), 6.75 (d,  $J = 9.5$  Hz, 1H), 3.90 (s, 3H).  **$^{13}C$  NMR** (126 MHz,  $CDCl_3$ )  $\delta$  161.1, 143.1, 141.6, 114.8, 113.5, 104.2, 81.3, 56.3. **HRMS (ESI)  $m/z$ :**  $[M+H]^+$  calculated for  $C_8H_7INO$  259.9567, found 259.9567

### Methyl 2-bromo-4-iodobenzoate (3l)

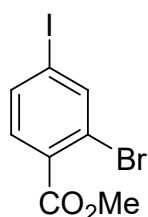

White solid, yield 54%.  **$^1H$  NMR** (500 MHz,  $CDCl_3$ )  $\delta$  8.04 (d,  $J = 1.7$  Hz, 1H), 7.70 (dd,  $J = 8.2, 1.7$  Hz, 1H), 7.51 (d,  $J = 8.2$  Hz, 1H), 3.91 (s, 3H).  **$^{13}C$  NMR** (126 MHz,  $CDCl_3$ )  $\delta$  166.0, 142.5, 136.4, 132.4, 131.4, 122.6, 98.7, 52.6. **HRMS (ESI)  $m/z$ :**  $[M+H]^+$  calculated for  $C_8H_6BrIO_2$  340.8669, found 340.8665.

### 2-bromo-4-iodo-1-methoxybenzene (3m)

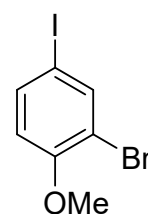

White solid, yield 40%.  **$^1H$  NMR** (500 MHz,  $CDCl_3$ )  $\delta$  7.82 (d,  $J = 2.1$  Hz, 1H), 7.54 (dd,  $J = 8.6, 2.1$  Hz, 1H), 6.65 (d,  $J = 8.6$  Hz, 1H), 3.87 (s, 3H).  **$^{13}C$  NMR** (126 MHz,  $CDCl_3$ )  $\delta$  156.0, 141.0, 137.3, 113.9, 113.0, 82.4, 56.3. **HRMS (ESI)  $m/z$ :**  $[M+H]^+$  calculated for  $C_7H_7BrIO$  312.8719, found 312.8719.

### 4-chloro-3-iodobenzenesulfonamide (3n)

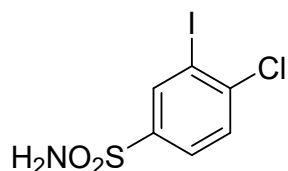

White solid, yield 70%. **<sup>1</sup>H NMR** (500 MHz, CDCl<sub>3</sub>) δ 8.31 (d, *J* = 2.0 Hz, 1H), 7.82 (dd, *J* = 8.4, 2.0 Hz, 1H), 7.78 (d, *J* = 8.3 Hz, 1H), 7.53 (s, 2H). **<sup>13</sup>C NMR** (126 MHz, DMSO-d<sub>6</sub>) δ 144.3, 141.4, 137.4, 130.4, 127.5, 99.9. **HRMS** (ESI) *m/z*: [M+H]<sup>+</sup> calculated for C<sub>6</sub>H<sub>6</sub>ClINO<sub>2</sub>S 317.8847, found 317.8847.

### 2-chloro-5-iodobenzenesulfonamide (3o)

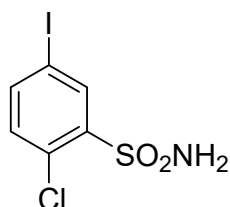

White solid, yield 61%. **<sup>1</sup>H NMR** (500 MHz, CDCl<sub>3</sub>) δ 8.22 (d, *J* = 2.1 Hz, 1H), 7.95 (dd, *J* = 8.3, 2.1 Hz, 1H), 7.72 (s, 2H), 7.43 (d, *J* = 8.3 Hz, 1H). **<sup>13</sup>C NMR** (126 MHz, DMSO) δ 143.0, 142.3, 137.3, 133.9, 130.8, 93.0. **HRMS** (ESI) *m/z*: [M+H]<sup>+</sup> calculated for C<sub>6</sub>H<sub>6</sub>ClINO<sub>2</sub>S 317.8847, found 317.8846.

### 3-iodo-5-methylbenzonitrile (3p)

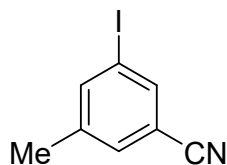

White solid, yield 51%. **<sup>1</sup>H NMR** (500 MHz, CDCl<sub>3</sub>) δ 7.77 (s, 2H), 7.42 (s, 1H), 2.35 (s, 3H). **<sup>13</sup>C NMR** (126 MHz, CDCl<sub>3</sub>) δ 142.6, 141.2, 137.5, 131.8, 117.3, 113.9, 93.8, 20.8. **HRMS** (ESI) *m/z*: [M+H]<sup>+</sup> calculated for C<sub>8</sub>H<sub>7</sub>IN 243.9618, found 243.9617.

### Methyl 4-iodo-2-methylbenzoate (3q)

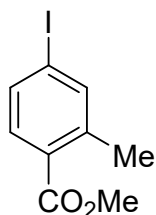

White solid, yield 38%. **<sup>1</sup>H NMR** (500 MHz, CDCl<sub>3</sub>) δ 7.64 (s, 1H), 7.62 – 7.57 (m, 2H), 3.88 (s, 3H), 2.54 (s, 3H). **<sup>13</sup>C NMR** (126 MHz, CDCl<sub>3</sub>) δ 167.5, 142.2, 140.6, 135.0, 131.9, 129.0, 99.5, 52.0, 21.4. **HRMS** (ESI) *m/z*: [M+H]<sup>+</sup> calculated for C<sub>9</sub>H<sub>10</sub>IO<sub>2</sub> 276.9720, found 276.9725.

### 7-iodo-3,4-dihydronaphthalen-1(2H)-one (3r)

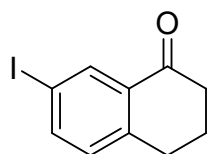

Yellow solid, yield 30%. **<sup>1</sup>H NMR** (500 MHz, CDCl<sub>3</sub>) δ 8.34 (d, *J* = 1.9 Hz, 1H), 7.76 (dd, *J* = 8.1, 2.0 Hz, 1H), 7.01 (d, *J* = 8.1 Hz, 1H), 2.90 (t, *J* = 6.1 Hz, 2H), 2.66 – 2.62 (m, 2H), 2.13 (p, *J* = 6.5 Hz, 2H). **<sup>13</sup>C NMR** (126 MHz, CDCl<sub>3</sub>) δ 196.9, 143.7, 141.9, 136.1, 134.2, 130.8, 91.6, 38.8, 29.3, 22.9. **HRMS** (ESI) *m/z*: [M+H]<sup>+</sup> calculated for C<sub>10</sub>H<sub>10</sub>IO 272.9771, found 272.9765.

### Methyl 4-bromobenzoate (3s)

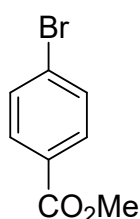

White solid, yield 60%. **<sup>1</sup>H NMR** (500 MHz, CDCl<sub>3</sub>) δ 7.90 (d, *J* = 8.1 Hz, 2H), 7.58 (d, *J* = 8.3 Hz, 2H), 3.91 (s, 3H). **<sup>13</sup>C NMR** (126 MHz, CDCl<sub>3</sub>) δ 166.4, 131.7, 131.1, 129.1, 128.0, 52.3. **HRMS** (ESI) *m/z*: [M+H]<sup>+</sup> Calculated for C<sub>8</sub>H<sub>8</sub>BrO<sub>2</sub> 214.9702, Found 214.9705.

### 1-bromo-4-methoxybenzene (3t)

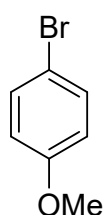

Yellow, yield 39%. <sup>1</sup>H NMR (500 MHz, CDCl<sub>3</sub>) δ 158.73, 132.25, 115.75, 112.84, 55.45. <sup>13</sup>C NMR (126 MHz, CDCl<sub>3</sub>) δ 158.7, 132.3, 115.8, 112.8, 55.5. HRMS (ESI) *m/z*: [M+H]<sup>+</sup> Calculated for C<sub>7</sub>H<sub>8</sub>BrO 186.9753, Found 186.9754.

### 1-(4-bromophenyl)ethan-1-one (3u)

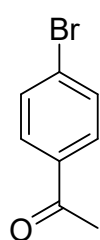

White solid, yield 43%. <sup>1</sup>H NMR (500 MHz, CDCl<sub>3</sub>) δ 7.83 (d, J = 8.6 Hz, 2H), 7.62 (d, J = 8.6 Hz, 2H), 2.60 (s, 3H). <sup>13</sup>C NMR (126 MHz, CDCl<sub>3</sub>) δ 197.0, 135.9, 131.9, 129.8, 128.3, 26.5. HRMS (ESI) *m/z*: [M+H]<sup>+</sup> Calculated for C<sub>8</sub>H<sub>8</sub>BrO 198.9753, Found 198.9758.

## 3.5 Synthesis of 5

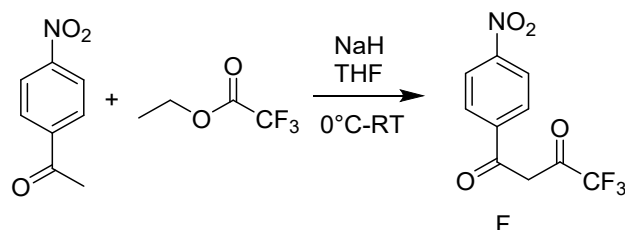

**Synthesis of 4,4,4-Trifluoro-1-(4-nitrophenyl)-1,3-butanedione:** Add a solution of acetophenone (825.7 mg, 5 mmol) in dry THF (20 mL) dropwise over 0.5 h to a mixture of NaH (480 mg, 20 mmol) and ethyl trifluoroacetate (2840 mg, 20 mmol) in dry THF (20 mL) and reflux the reaction mixture for 8 h. The reaction was quenched with dilute acetic acid aqueous solution (20 mL) and extracted into DCM (3 x 15 mL). The combined organic fractions were washed with brine, dried over MgSO<sub>4</sub> and evaporated under reduced pressure. Purification by column chromatography (PE/EtOAc 3:1) afforded 4,4,4-Trifluoro-1-(4-nitrophenyl)-1,3-butanedione as gray-green solid (562 mg, yield 43%). <sup>1</sup>H NMR (500 MHz, CDCl<sub>3</sub>) δ 8.38 (d, J = 8.5 Hz, 2H), 8.14 (d, J = 8.5 Hz, 2H), 6.64 (s, 1H). <sup>13</sup>C NMR (126 MHz, CDCl<sub>3</sub>) δ 182.4, 179.2, 178.9 (d, J = 37.8 Hz), 150.7, 138.2, 128.6, 124.1, 120.2, 117.9 (q, J = 284.8 Hz), 115.7, 113.4, 93.4. <sup>19</sup>F NMR (471 MHz, CDCl<sub>3</sub>) δ -76.7. HRMS (ESI) *m/z*: [M+H]<sup>+</sup> calculated for C<sub>10</sub>H<sub>7</sub>F<sub>3</sub>NO<sub>4</sub> 262.0322, found 262.0330.

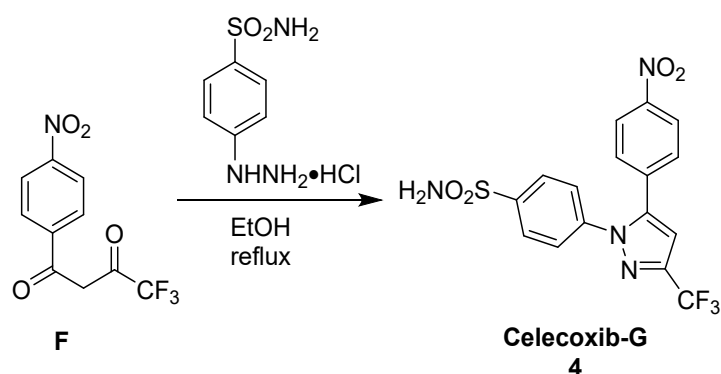

**Synthesis of 4-(5-(4-nitrophenyl)-3-(trifluoromethyl)-1H-pyrazol-1-yl)benzenesulfonamide (Celecoxib-G):** To a solution of 4,4,4-trifluoro-1-(4-bromophenyl)butane-1,3-dione (261 mg, 1 mmol) in EtOH (20 mL) at r.t. was added 4-Hydrazinylbenzenesulfonamide hydrochloride (246 mg, 1.1 mmol), the mixture was let to stir for 24 h at 70 °C, The reaction was quenched with H<sub>2</sub>O (20 mL) and extracted into DCM (3 x 15 mL). The combined organic fractions were washed with brine, dried over MgSO<sub>4</sub> and evaporated under reduced pressure. Purification by column chromatography (PE/ EtOAc 2:1) afforded 4-(5-(4-nitrophenyl)-3-(trifluoromethyl)-1H-pyrazol-1-yl)benzenesulfonamide as White solid (164 mg, yield 40%). <sup>1</sup>H NMR (500 MHz, DMSO-*d*<sub>6</sub>) δ 8.23 (d, *J* = 8.9 Hz, 2H), 7.87 (d, *J* = 8.6 Hz, 2H), 7.58 (dd, *J* = 13.7, 8.8 Hz, 4H), 7.50 (s, 2H), 7.41 (s, 1H). <sup>13</sup>C NMR (126 MHz, DMSO-*d*<sub>6</sub>) δ 148.1, 144.8, 143.6, 143.4, 143.1, 142.8(q, *J* = 37.8 Hz), 142.5, 141.1, 135.0, 130.8, 127.5, 127.2, 126.6, 124.8, 124.4, 122.7, 120.5, 108.2. <sup>19</sup>F NMR (471 MHz, DMSO-*d*<sub>6</sub>) δ -60.3. HRMS (ESI) *m/z*: [M+H]<sup>+</sup> calculated for C<sub>16</sub>H<sub>12</sub>F<sub>3</sub>N<sub>4</sub>O<sub>4</sub>S 413.0526, found 413.0531.

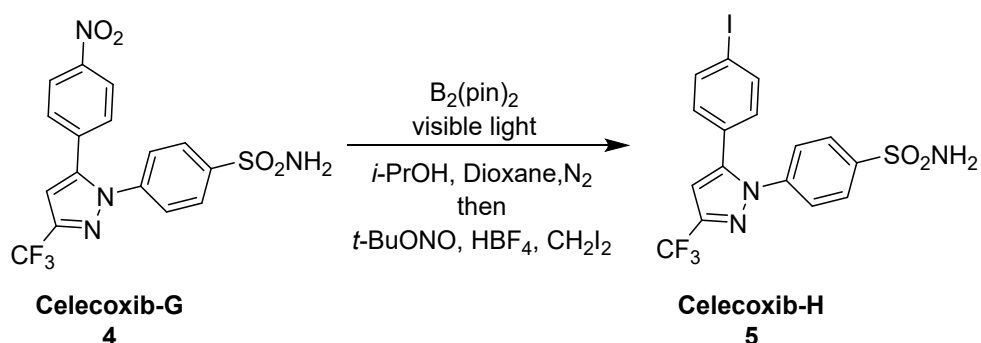

**Synthesis of 4-(5-(4-iodophenyl)-3-(trifluoromethyl)-1H-pyrazol-1-yl)benzenesulfonamide (Celecoxib-H):** Prepared from Celecoxib-G (123.7 mg, 0.3 mmol) as starting materials according to *General Procedure II* and purified by flash

column chromatography (PE/EA 1:1) afforded **Celecoxib-H** as White solid, yield 35%. **<sup>1</sup>H NMR** (500 MHz, CDCl<sub>3</sub>) δ 7.91 (d, *J* = 8.7 Hz, 2H), 7.71 (d, *J* = 8.4 Hz, 2H), 7.44 (d, *J* = 8.7 Hz, 2H), 6.96 (d, *J* = 8.4 Hz, 2H), 6.77 (s, 1H), 5.28 (s, 2H). **<sup>13</sup>C NMR** (126 MHz, CDCl<sub>3</sub>) δ 144.7, 144.4, (q, *J* = 37.8 Hz), 144.1, 143.8, 142.1, 141.8, 138.3, 130.4, 128.0, 127.7, 125.6, 124.1, 122.0(q, *J* = 269.6 Hz), 119.8, 117.7, 106.7, 95.9. **<sup>19</sup>F NMR** (471 MHz, CDCl<sub>3</sub>) δ -60.9. **HRMS** (ESI) *m/z*: [M+H]<sup>+</sup> calculated for C<sub>16</sub>H<sub>12</sub>F<sub>3</sub>IN<sub>3</sub>O<sub>2</sub>S 493.9642, found 493.9645.

## 4. Plausible Pathway for the Reaction

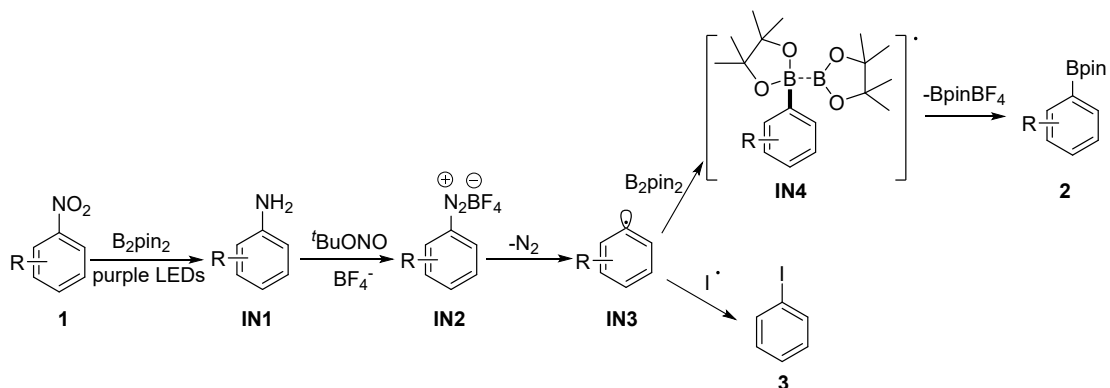

Based on the mechanism of Májek et al. and combined with our experimental results, we propose a possible reaction pathway.<sup>1-3</sup> Nitroarenes are treated with  $B_2pin_2$  and purple LEDs to produce aniline **IN1**, followed by tert-butyl nitrite and fluoroborate to produce diazonium salt **IN2**. Diazo salts **IN2** easily lose nitrogen to form aryl radicals **IN3**. Then, the aryl radical **IN3** is trapped by  $B_2pin_2$  to form radical intermediates **IN4**. Finally, the transition state **IN4** leads to B-B bond fission, and the final product **2** is formed. The way of forming iodine products is similar to the boration reaction.

## 5. NMR Spectra

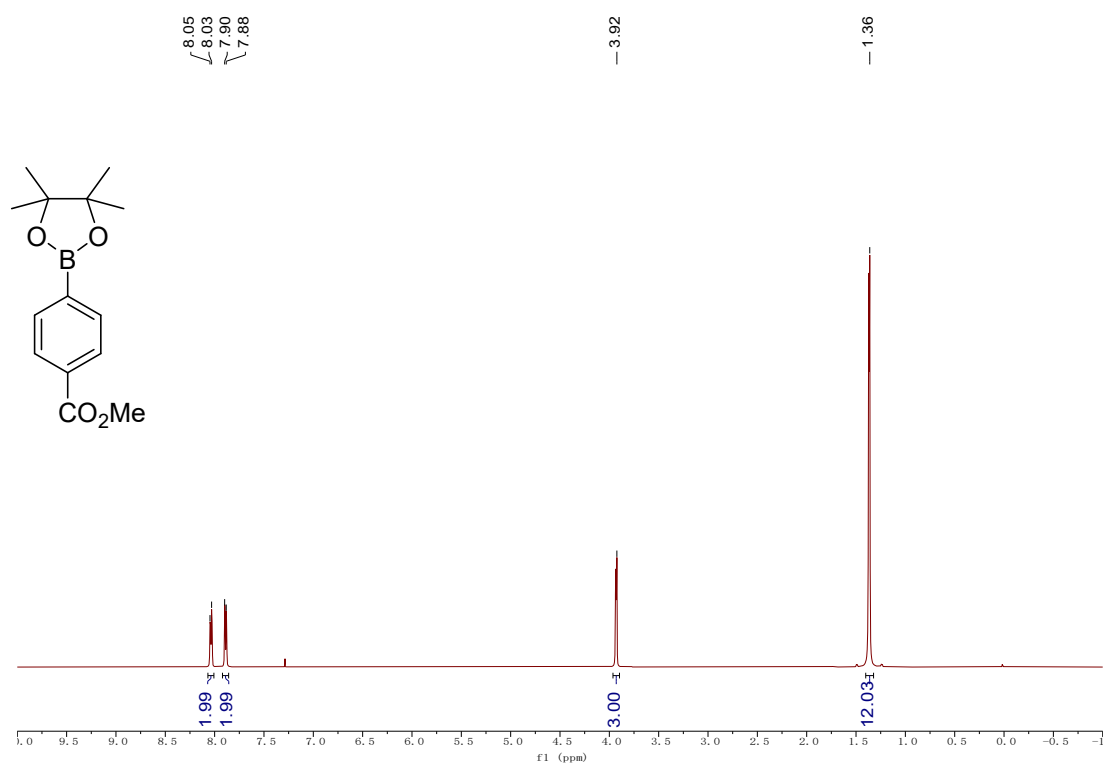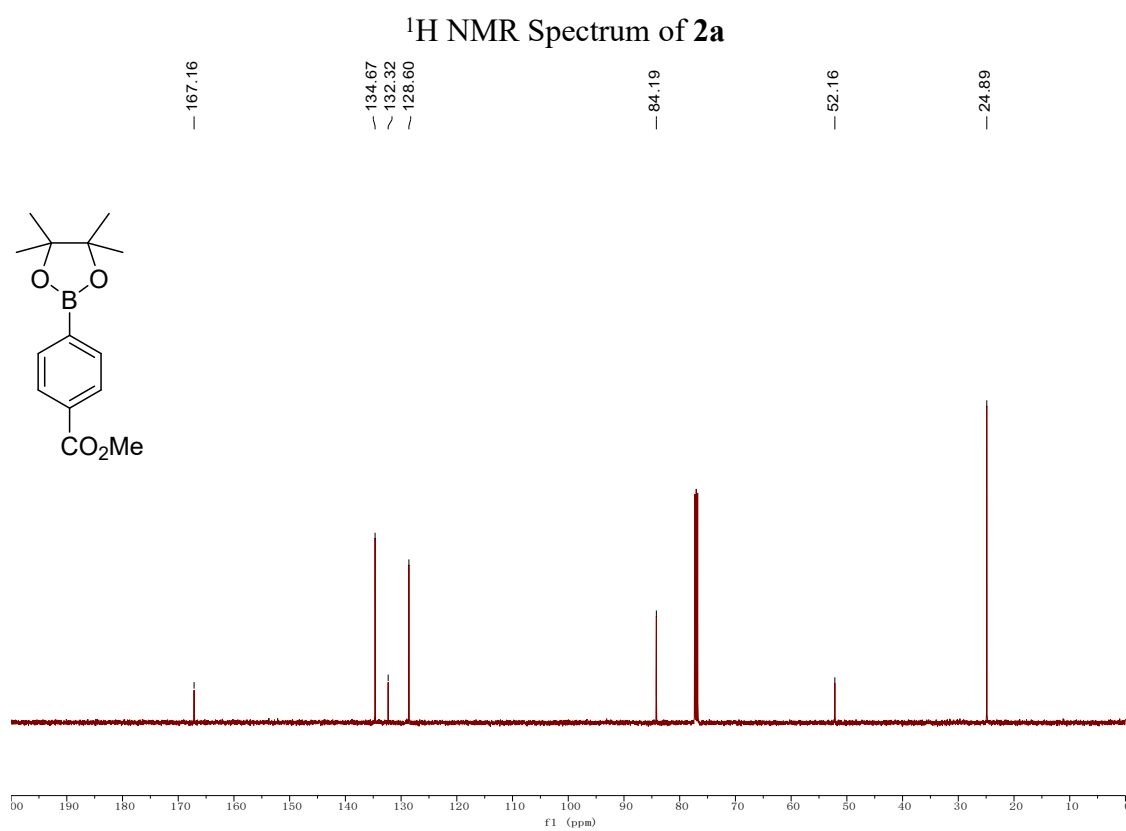



### <sup>13</sup>C NMR Spectrum of 2a

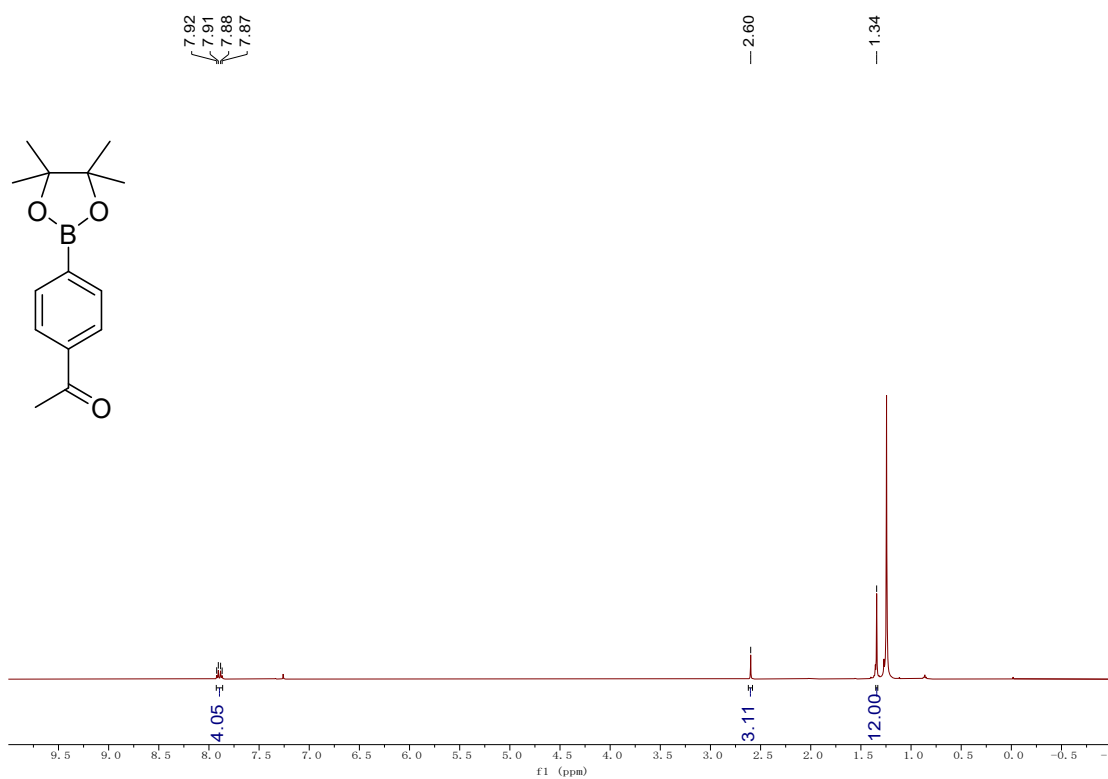

### <sup>1</sup>H NMR Spectrum of 2b

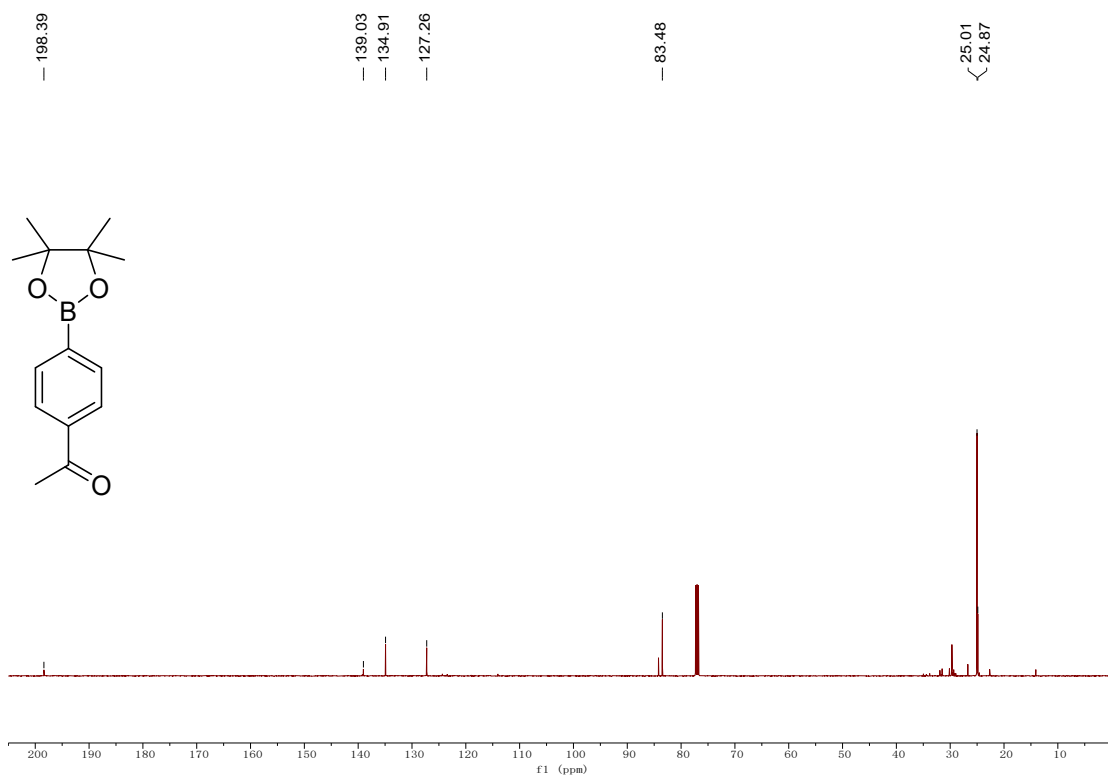

### <sup>13</sup>C NMR Spectrum of 2b



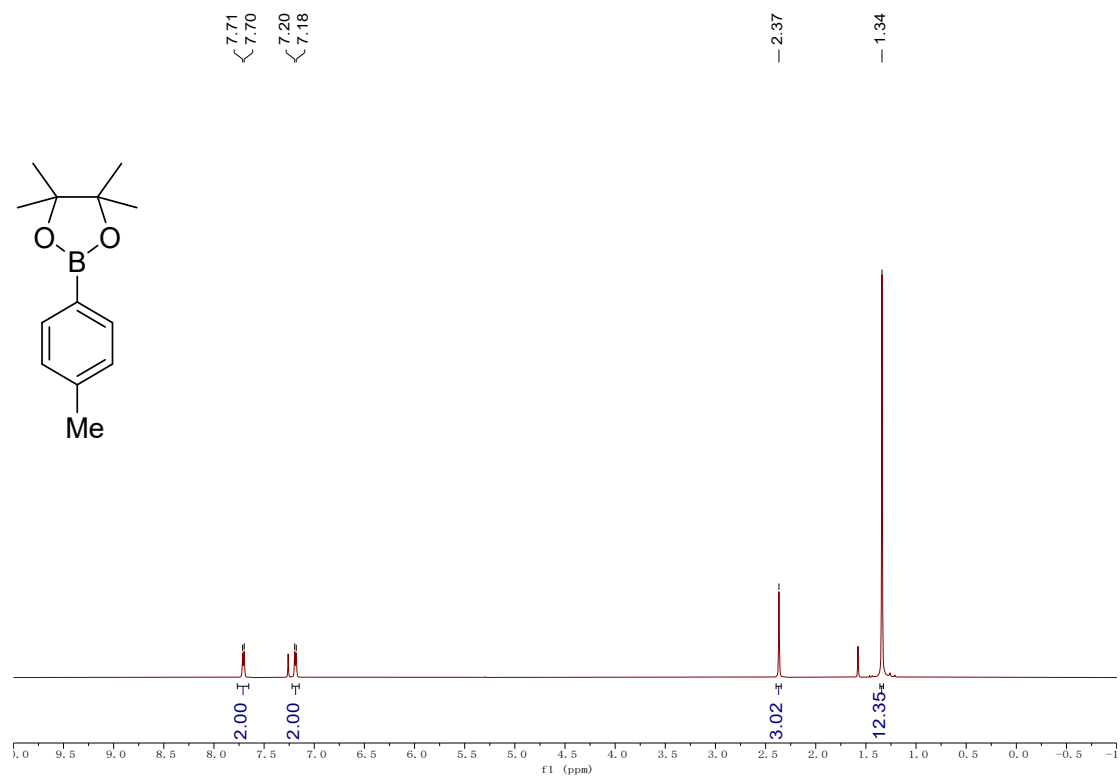

<sup>1</sup>H NMR Spectrum of **2c**

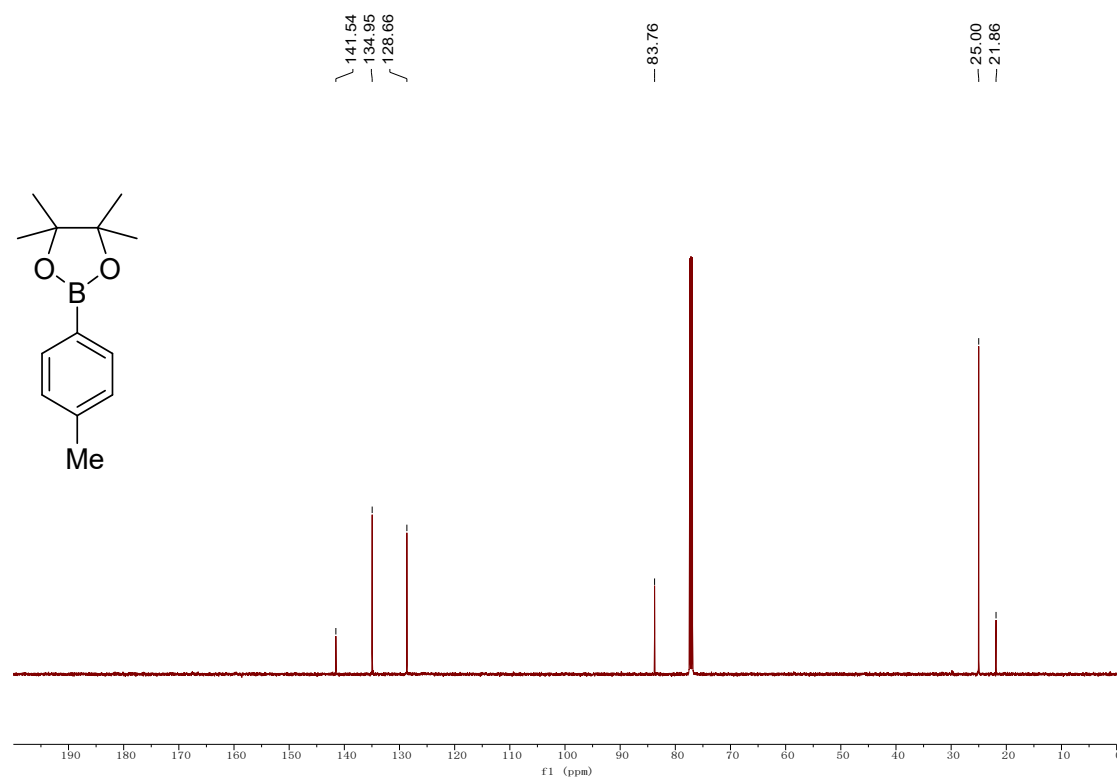

<sup>13</sup>C NMR Spectrum of **2c**

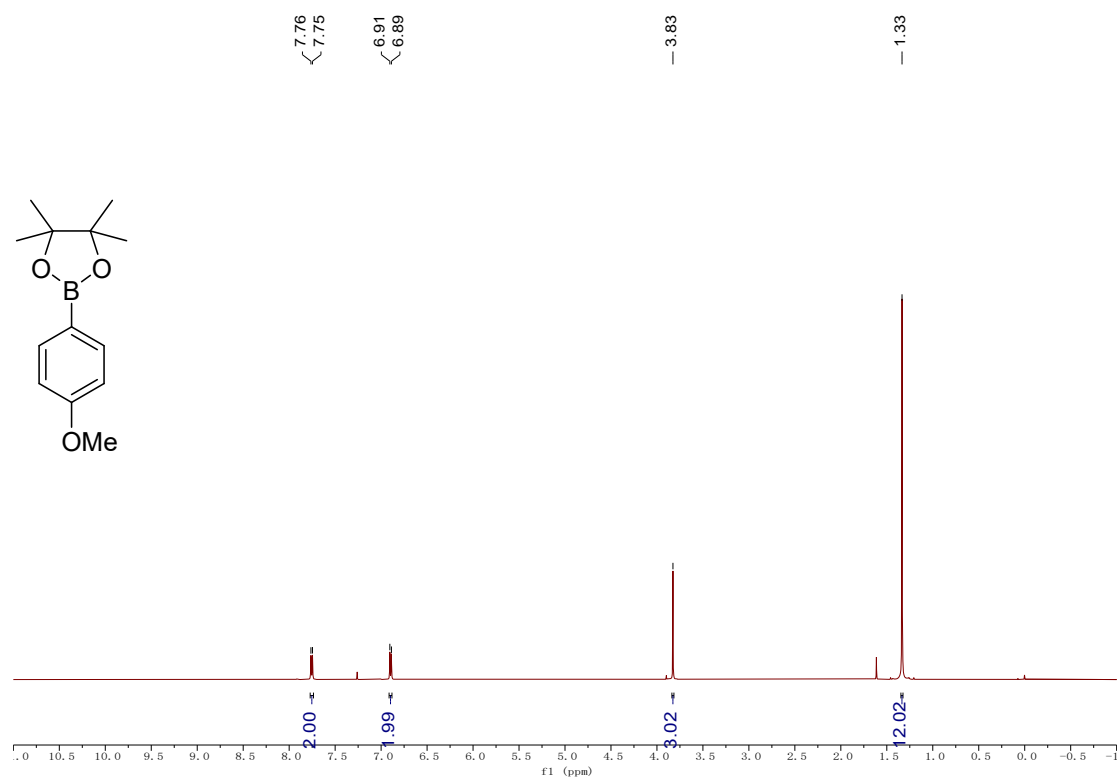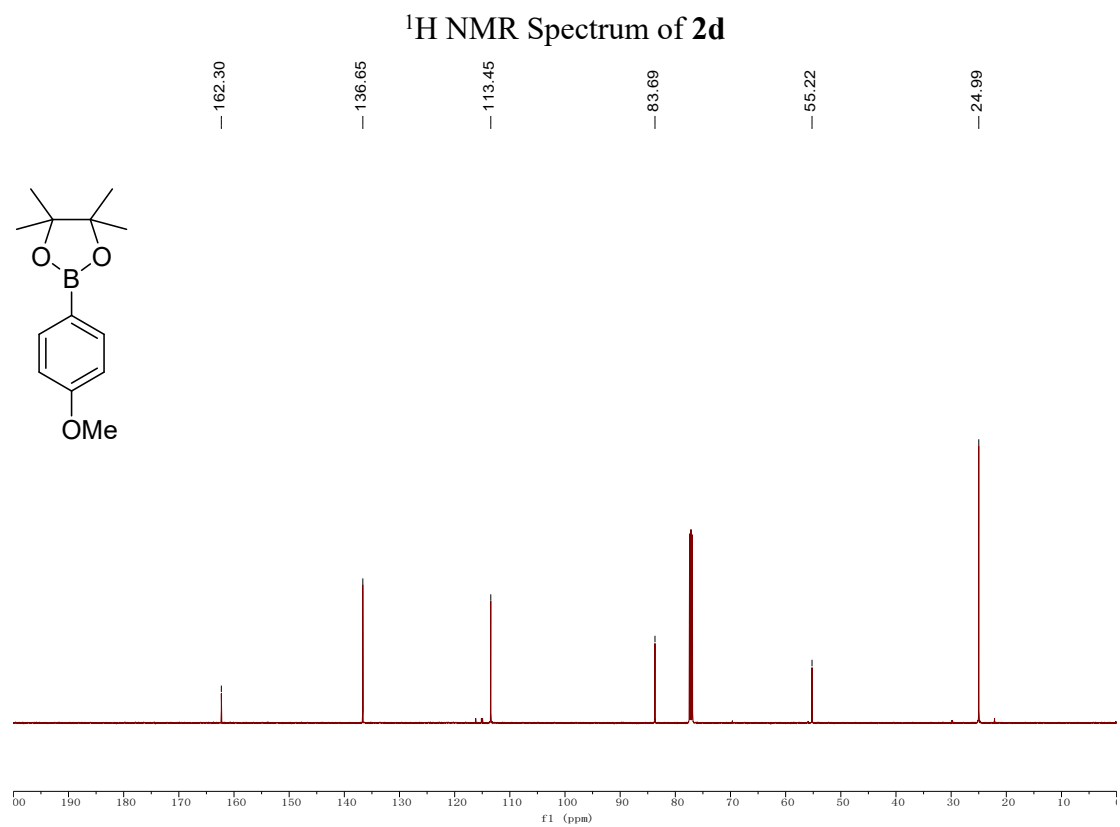

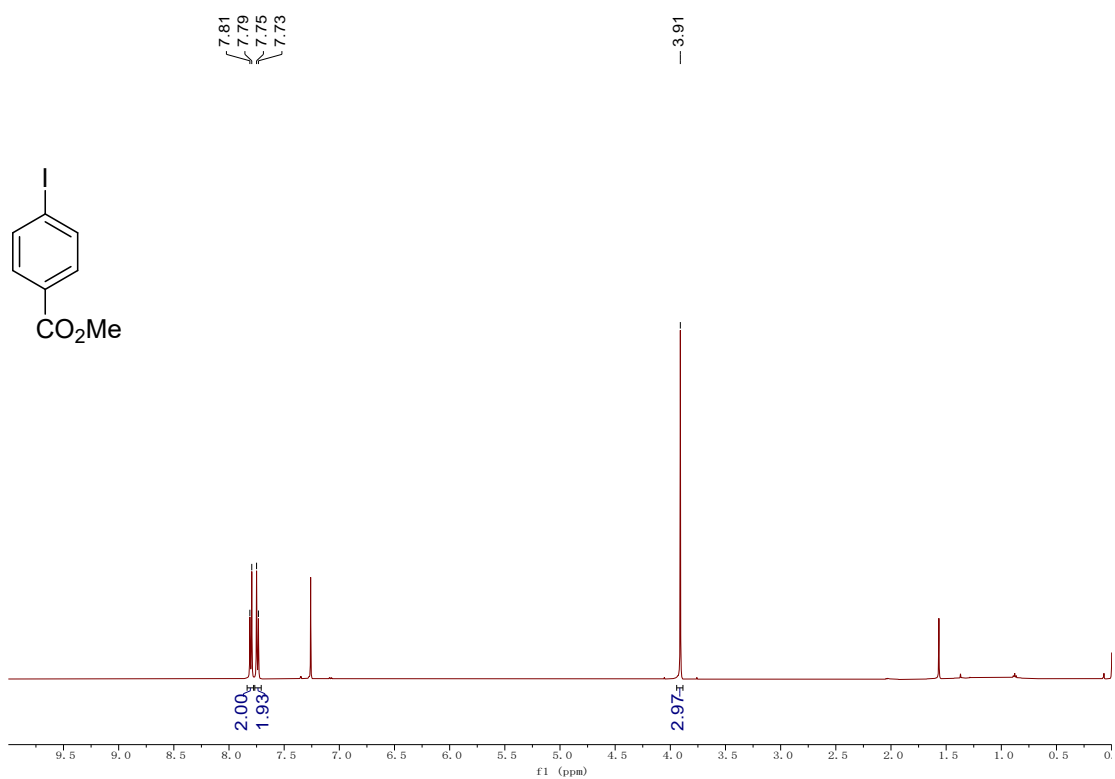

<sup>1</sup>H NMR Spectrum of 3a

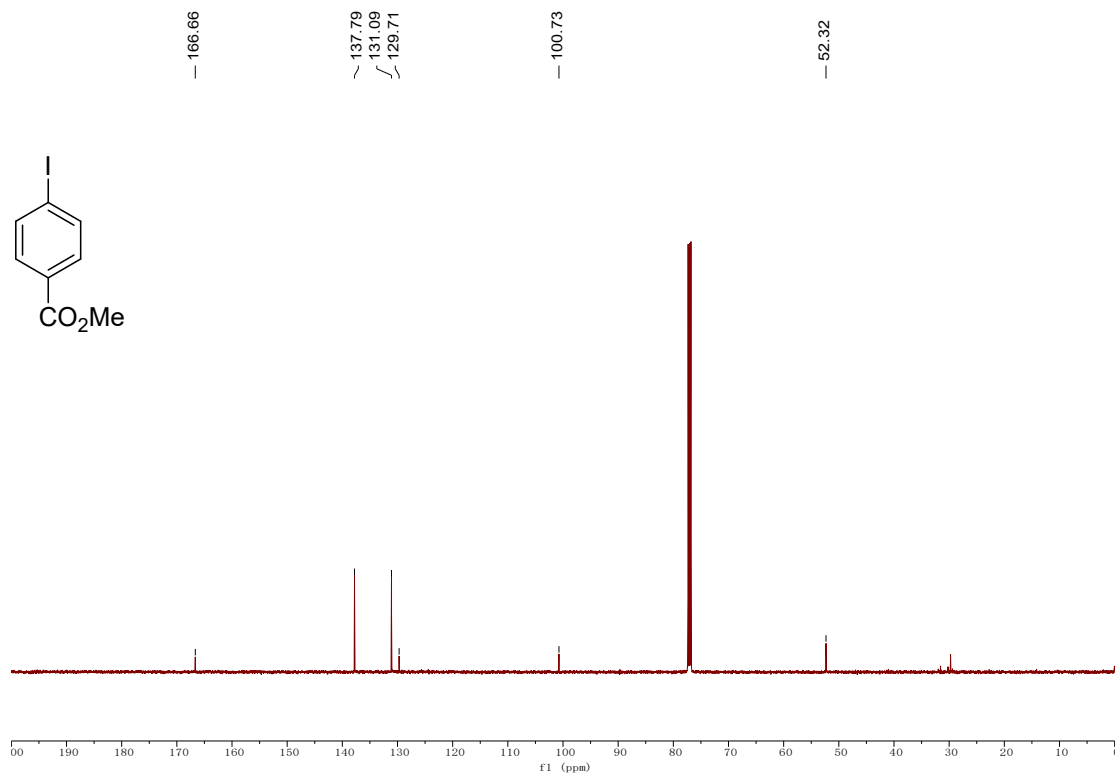

<sup>13</sup>C NMR Spectrum of 3a

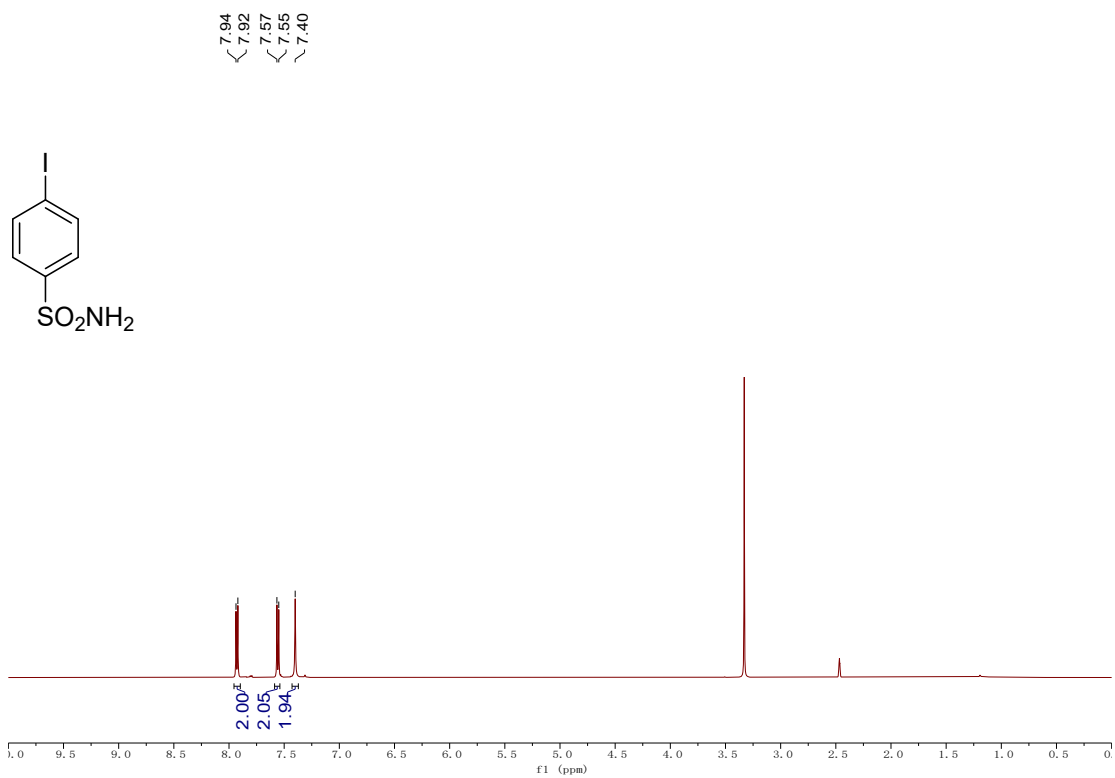

<sup>1</sup>H NMR Spectrum of **3b**

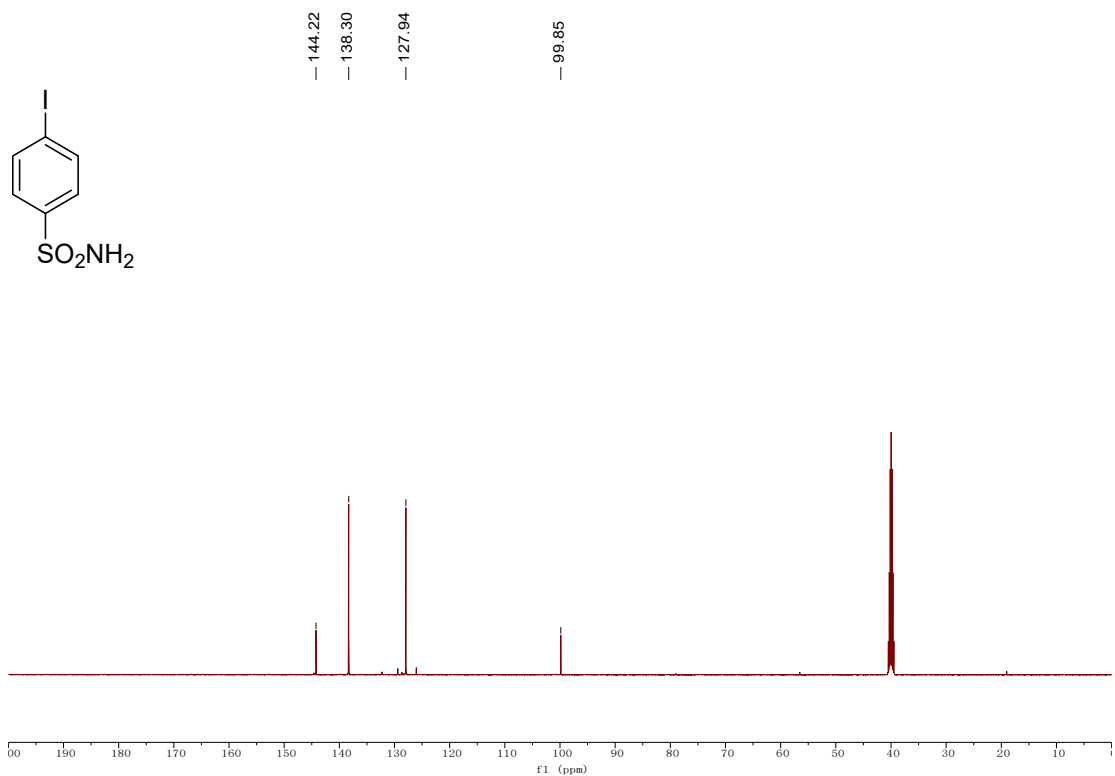

<sup>13</sup>C NMR Spectrum of **3b**

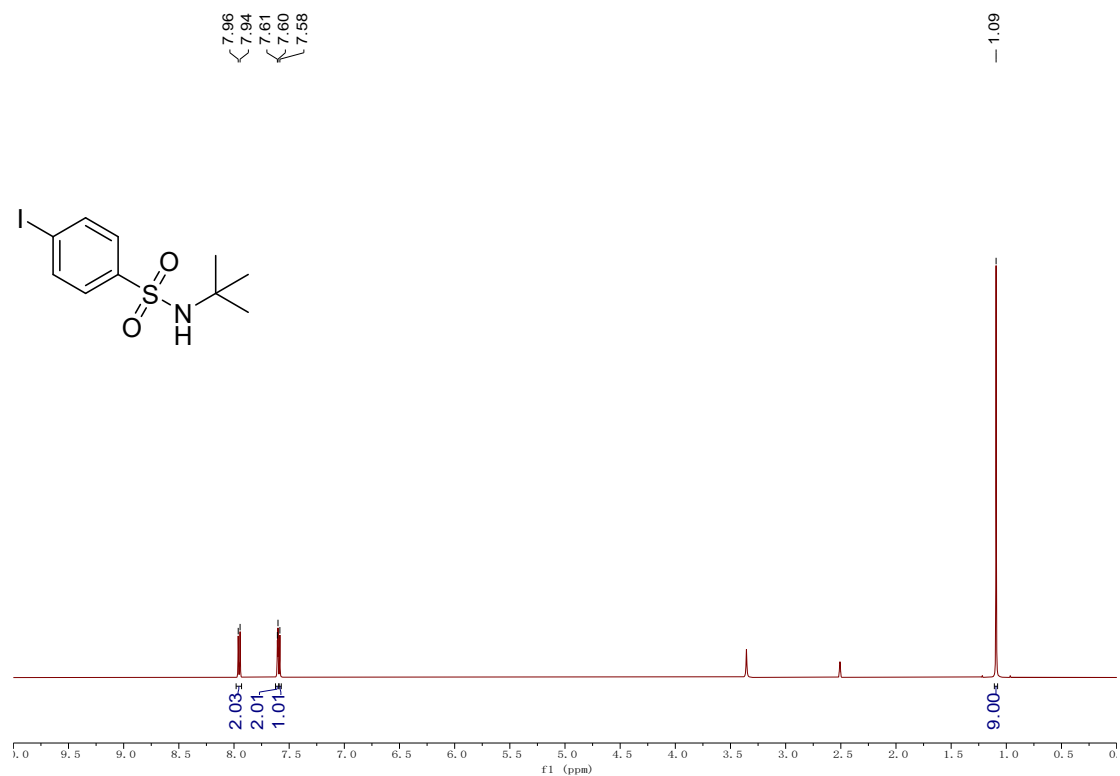

<sup>1</sup>H NMR Spectrum of 3c

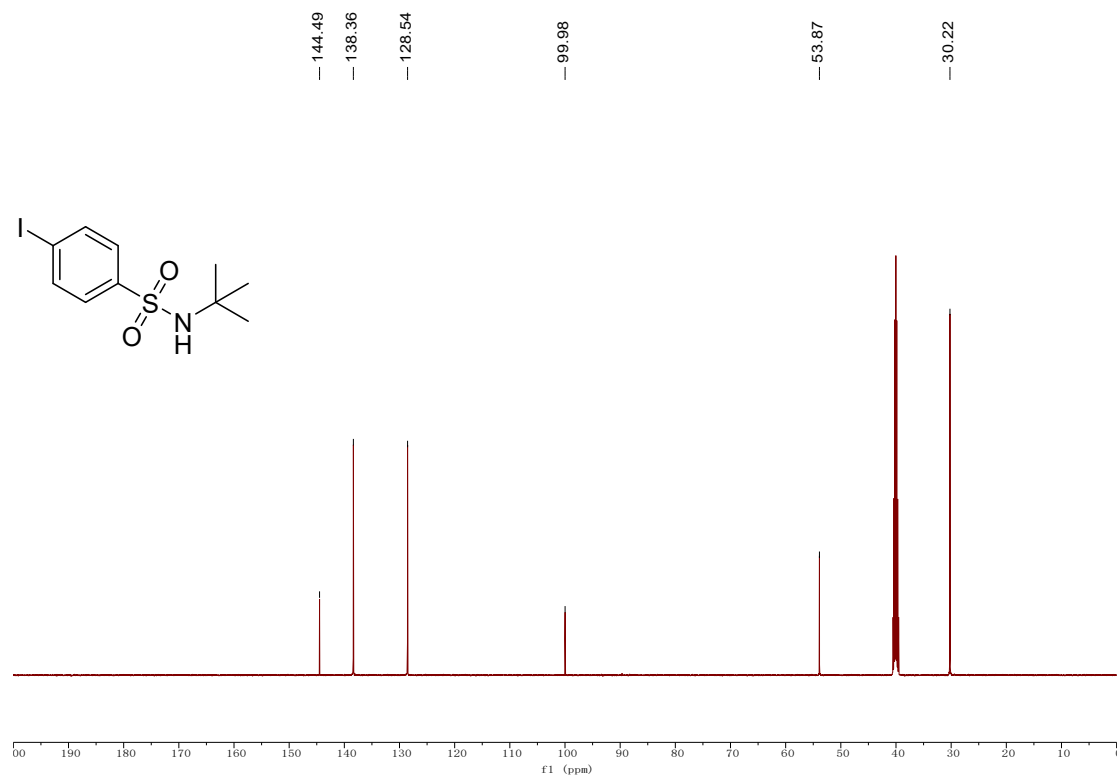

<sup>13</sup>C NMR Spectrum of 3c

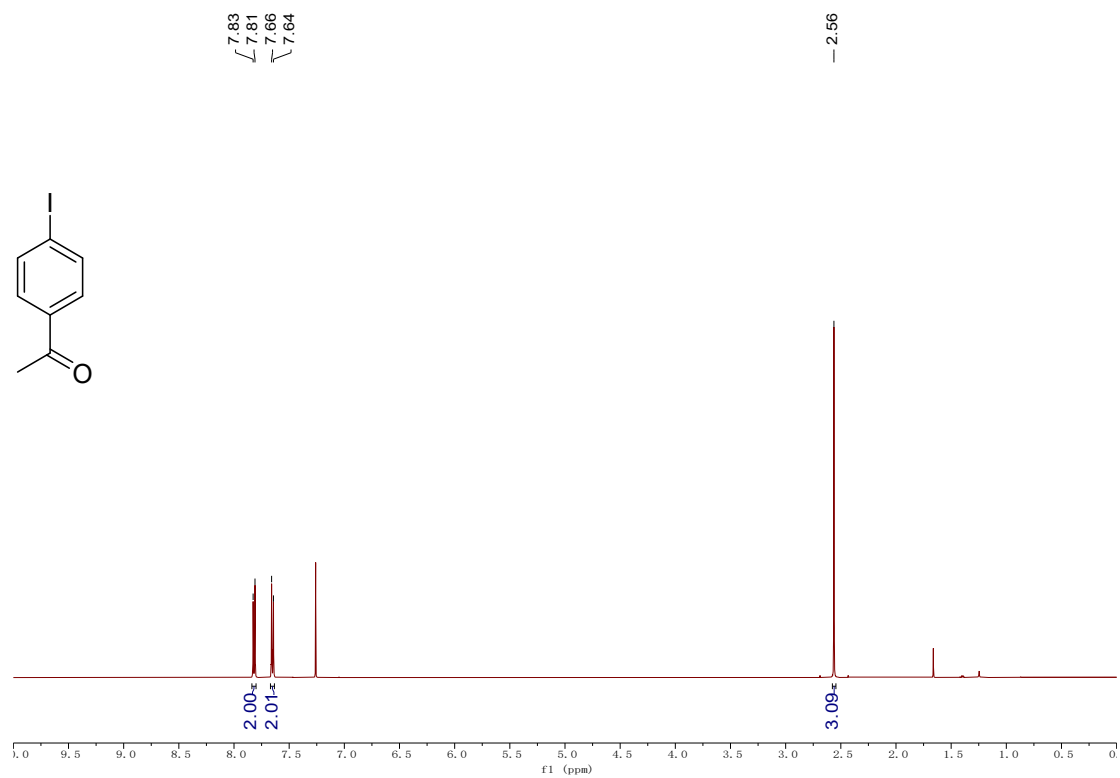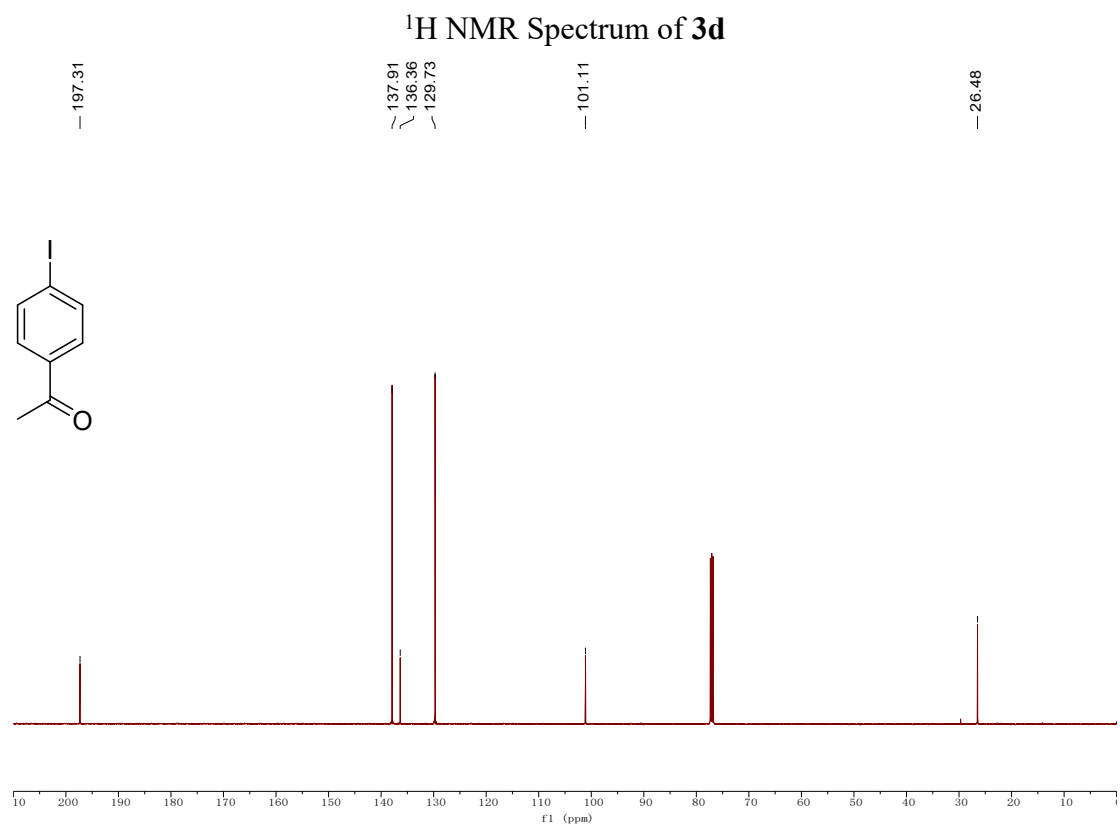

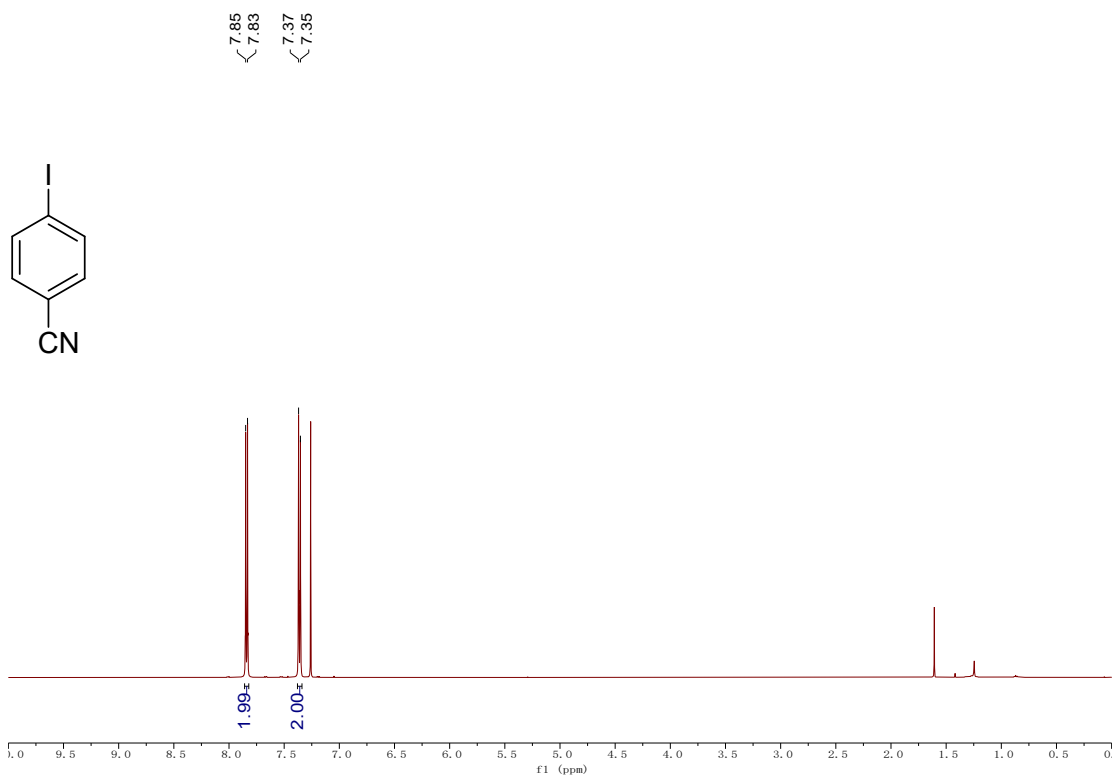

<sup>1</sup>H NMR Spectrum of **3e**

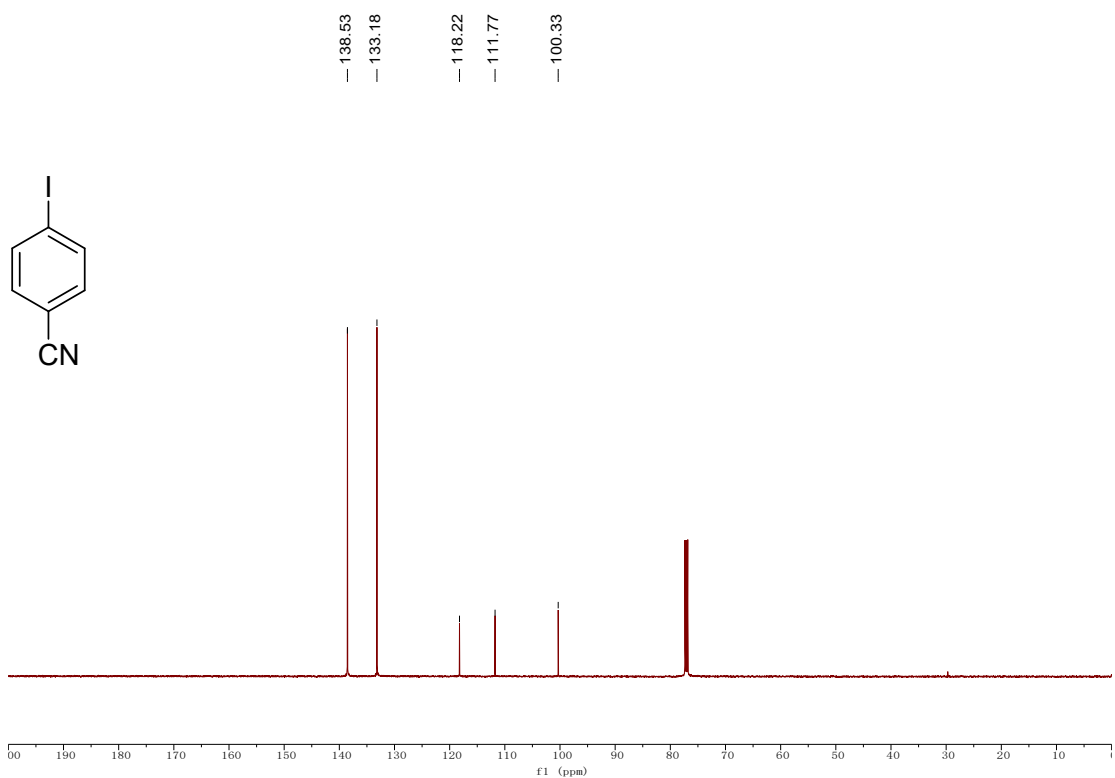

<sup>13</sup>C NMR Spectrum of **3e**



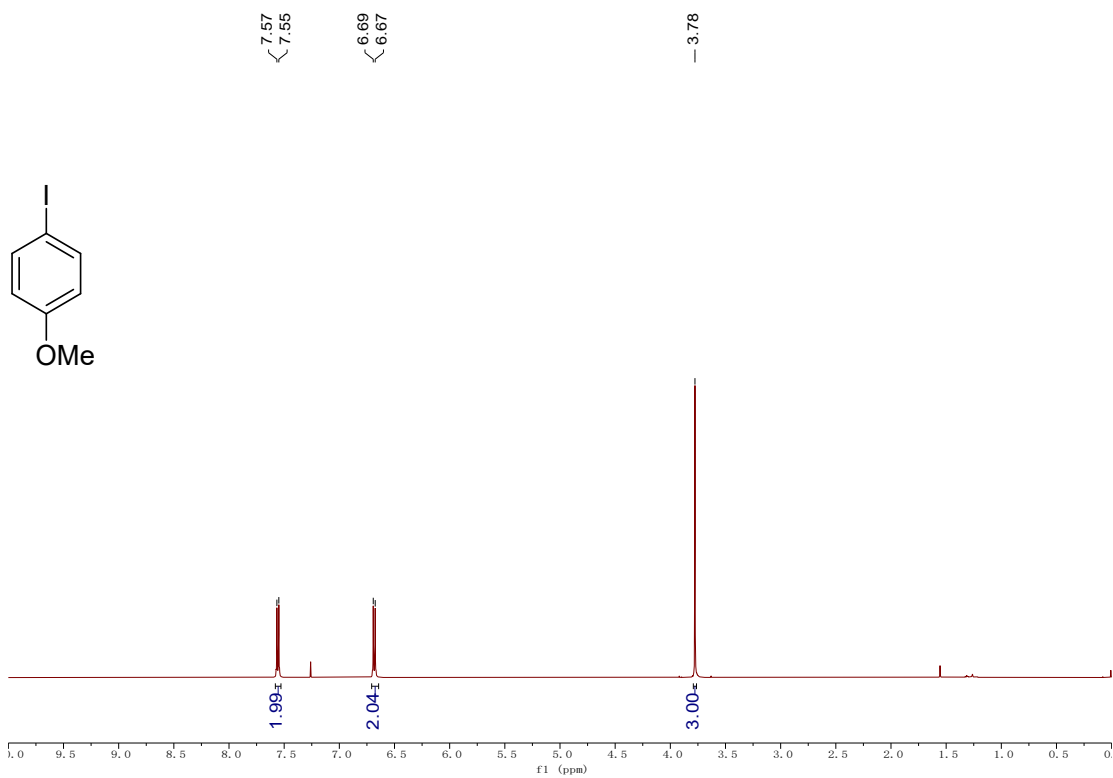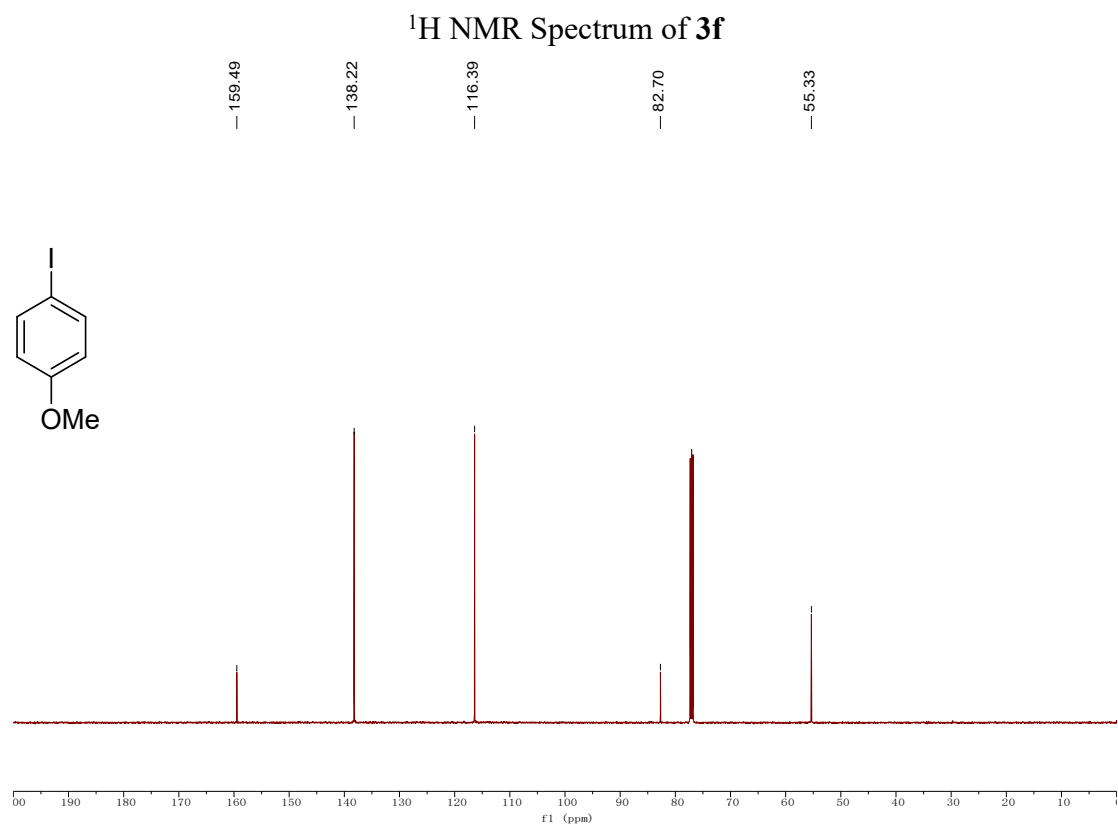

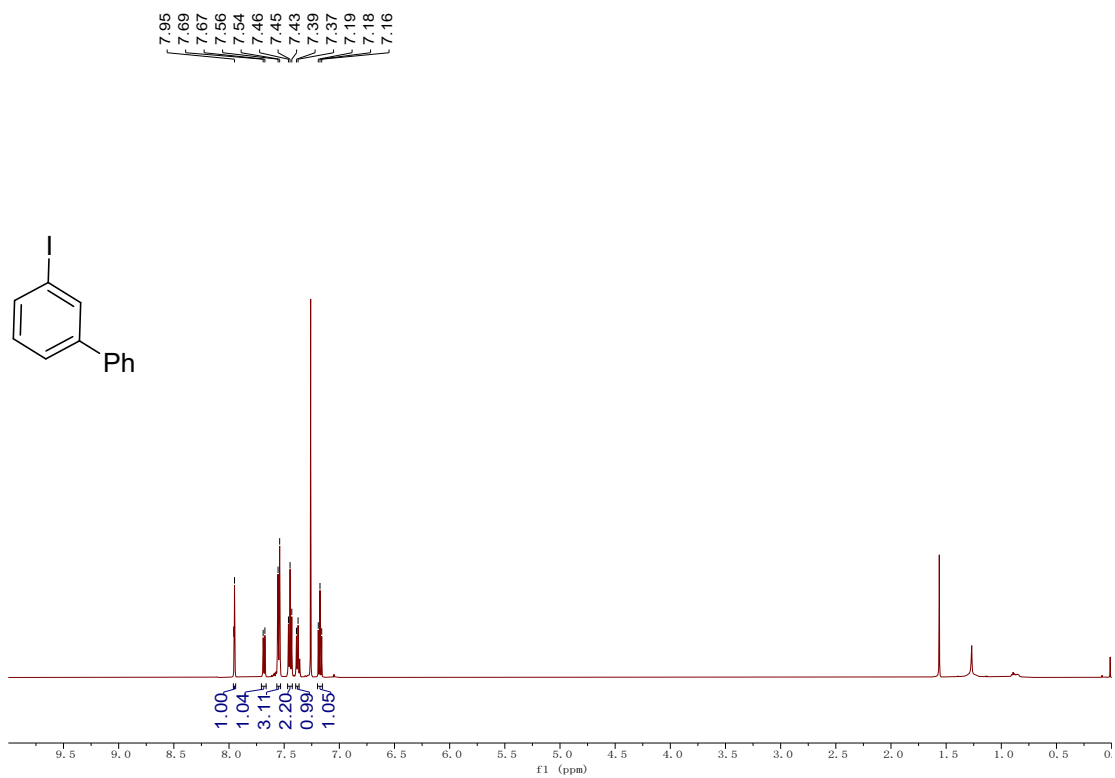

<sup>1</sup>H NMR Spectrum of **3g**

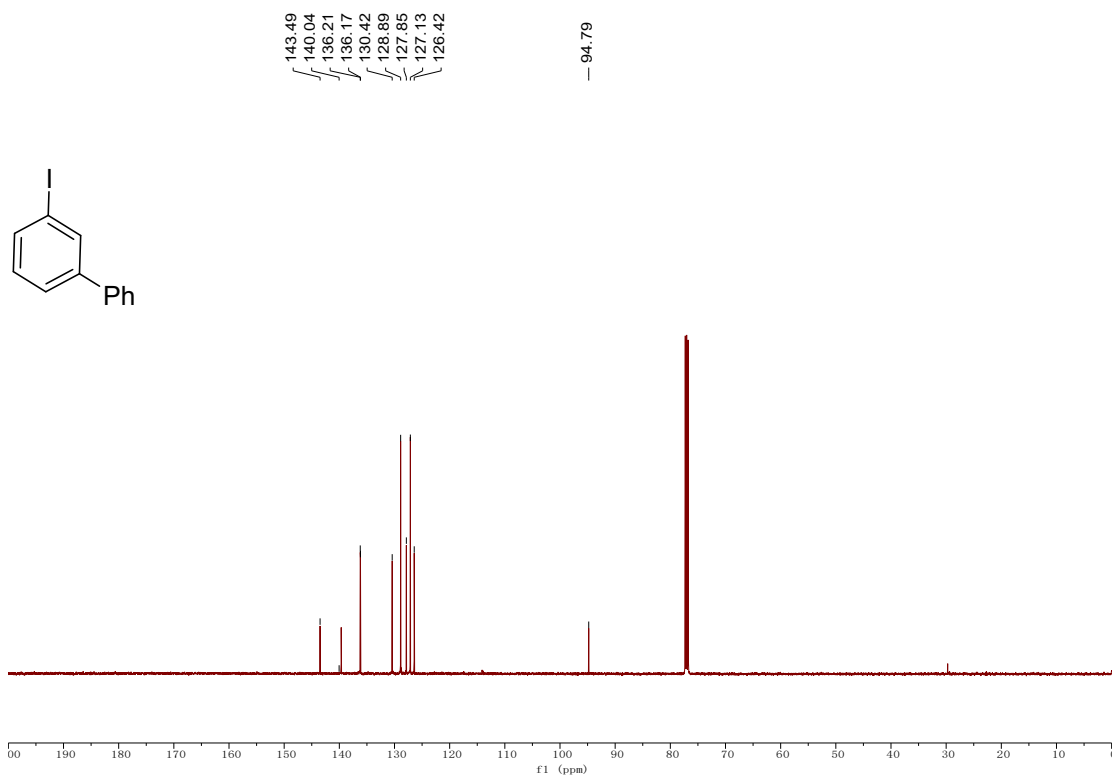

<sup>13</sup>C NMR Spectrum of **3g**

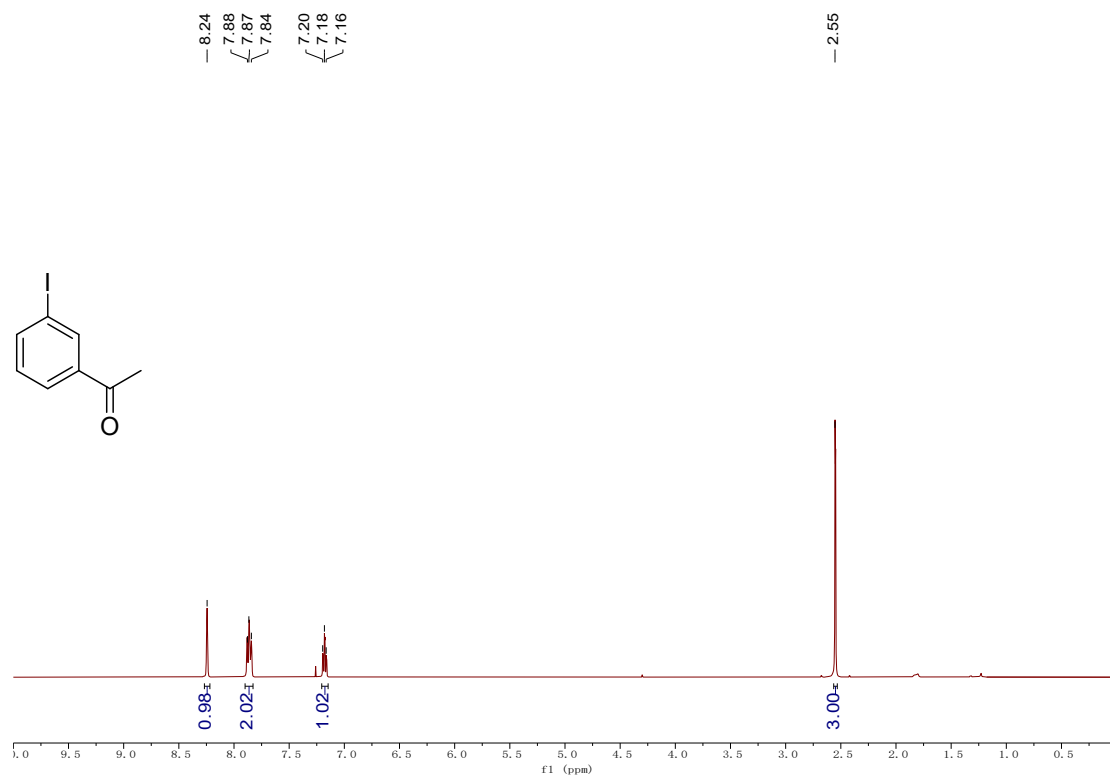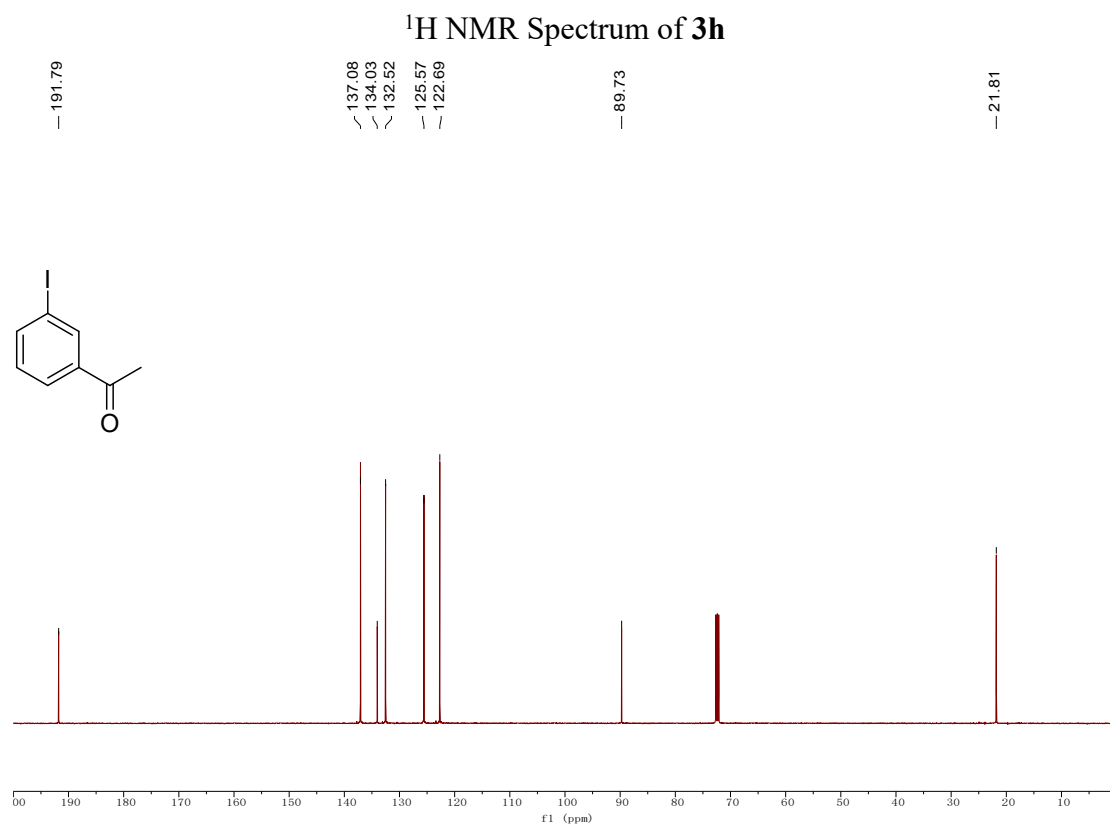

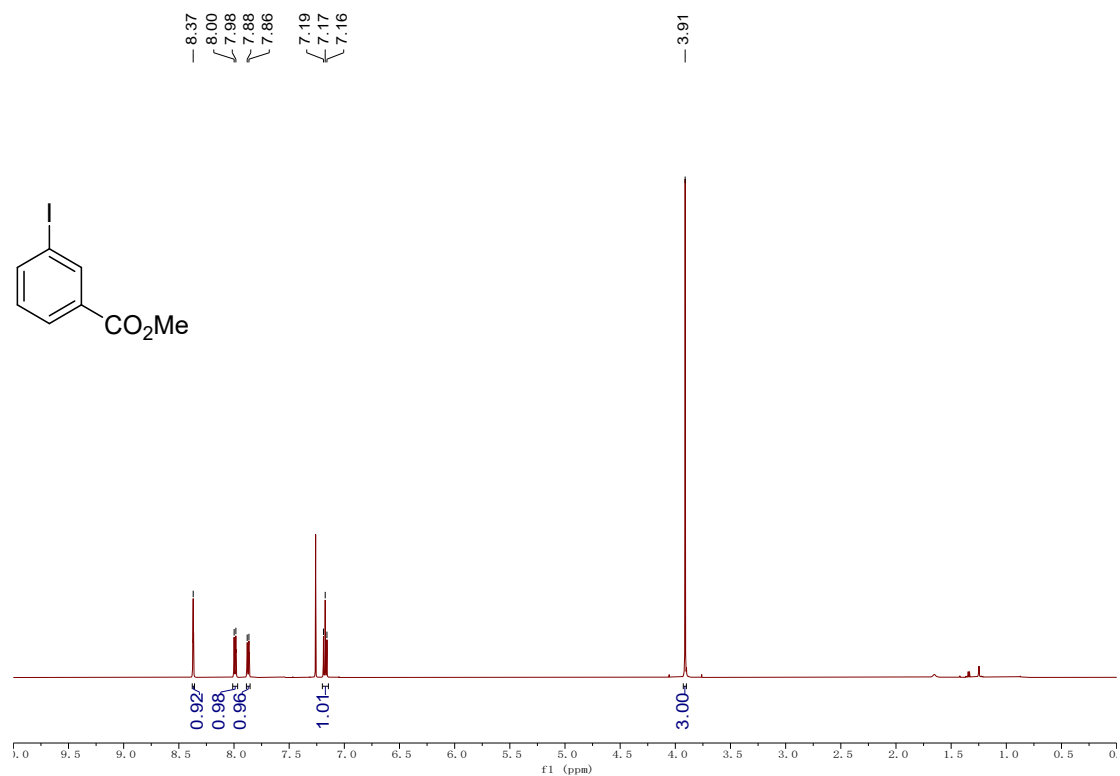

<sup>1</sup>H NMR Spectrum of 3i

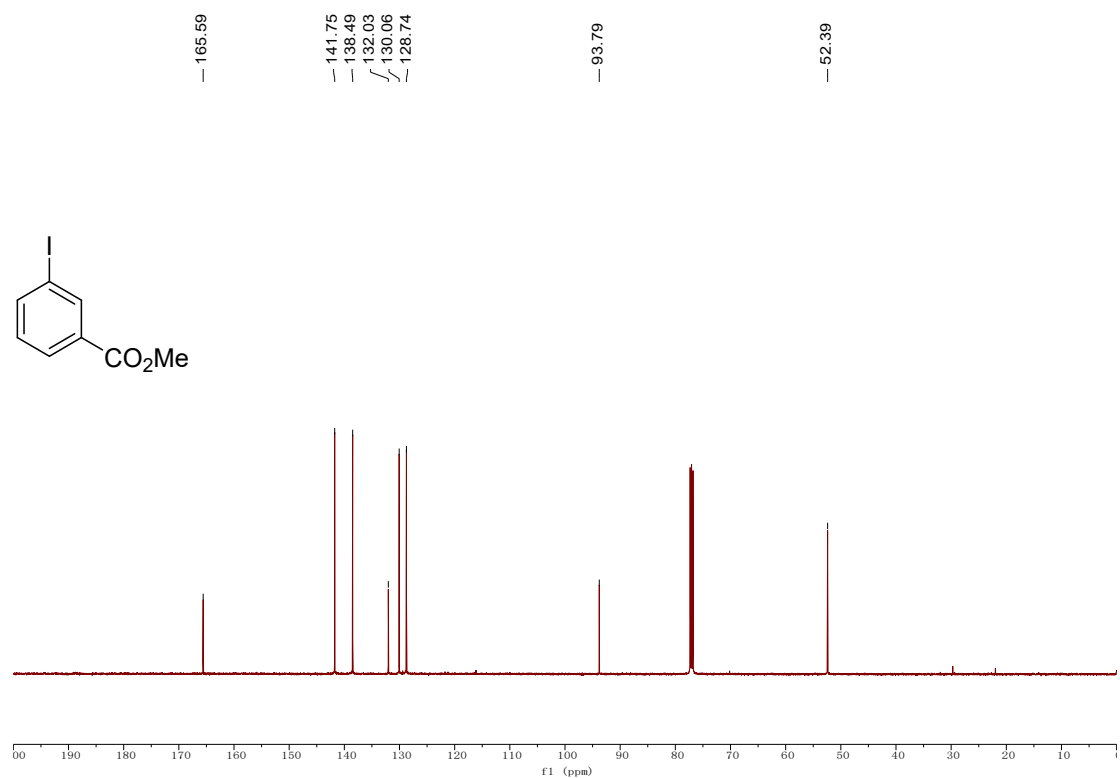

<sup>13</sup>C NMR Spectrum of 3i

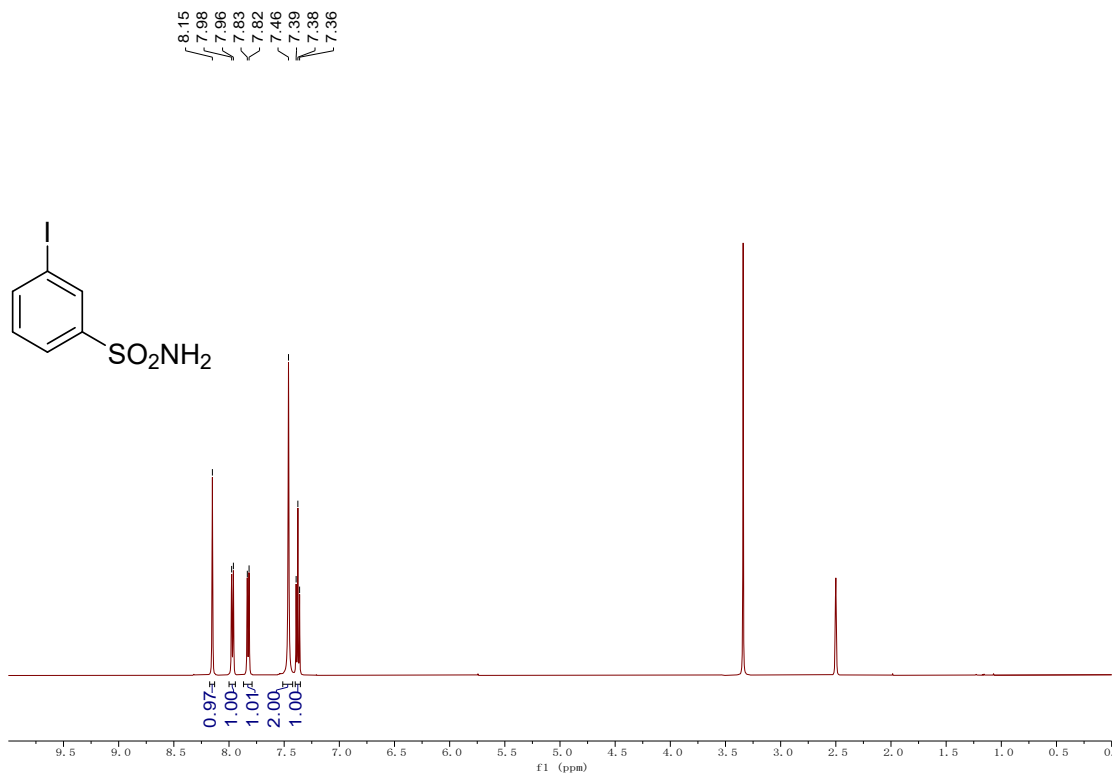

<sup>1</sup>H NMR Spectrum of **3j**

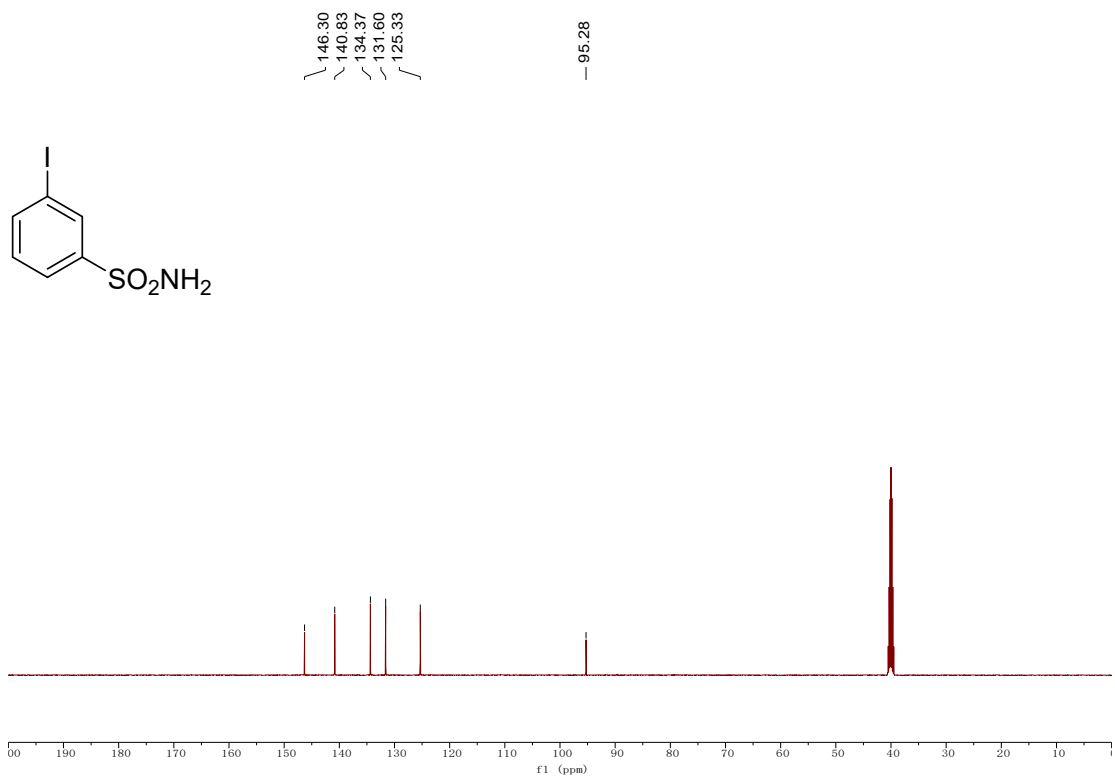

<sup>13</sup>C NMR Spectrum of **3j**

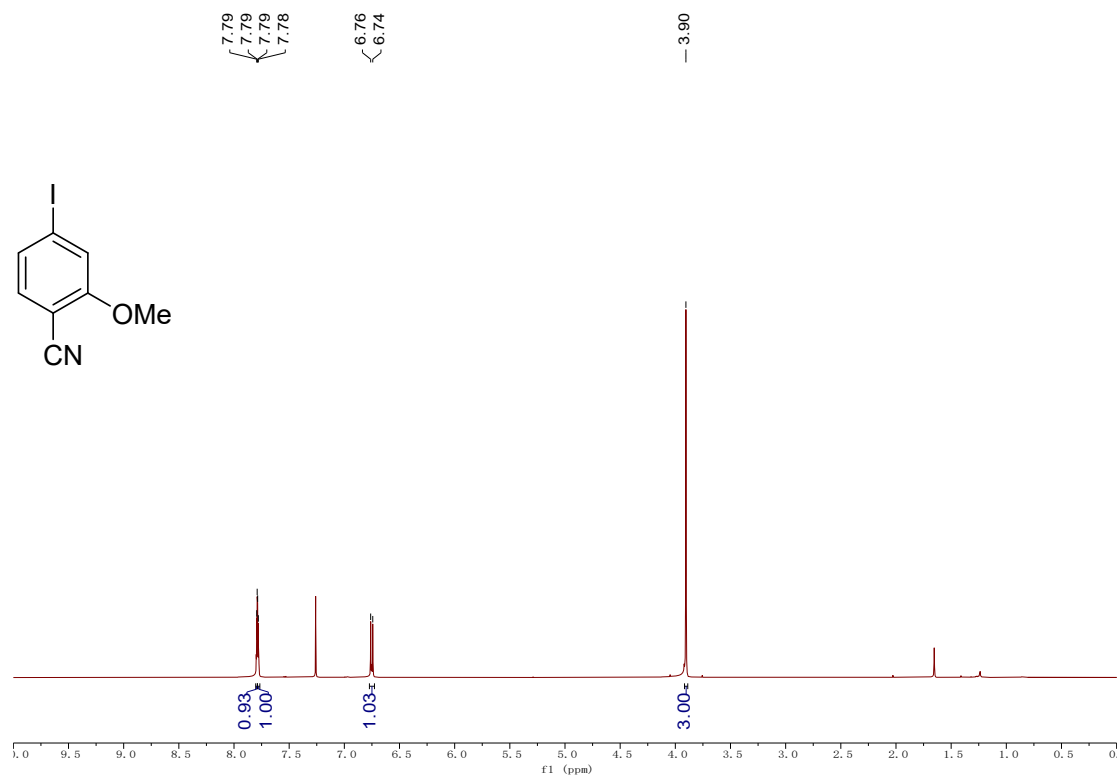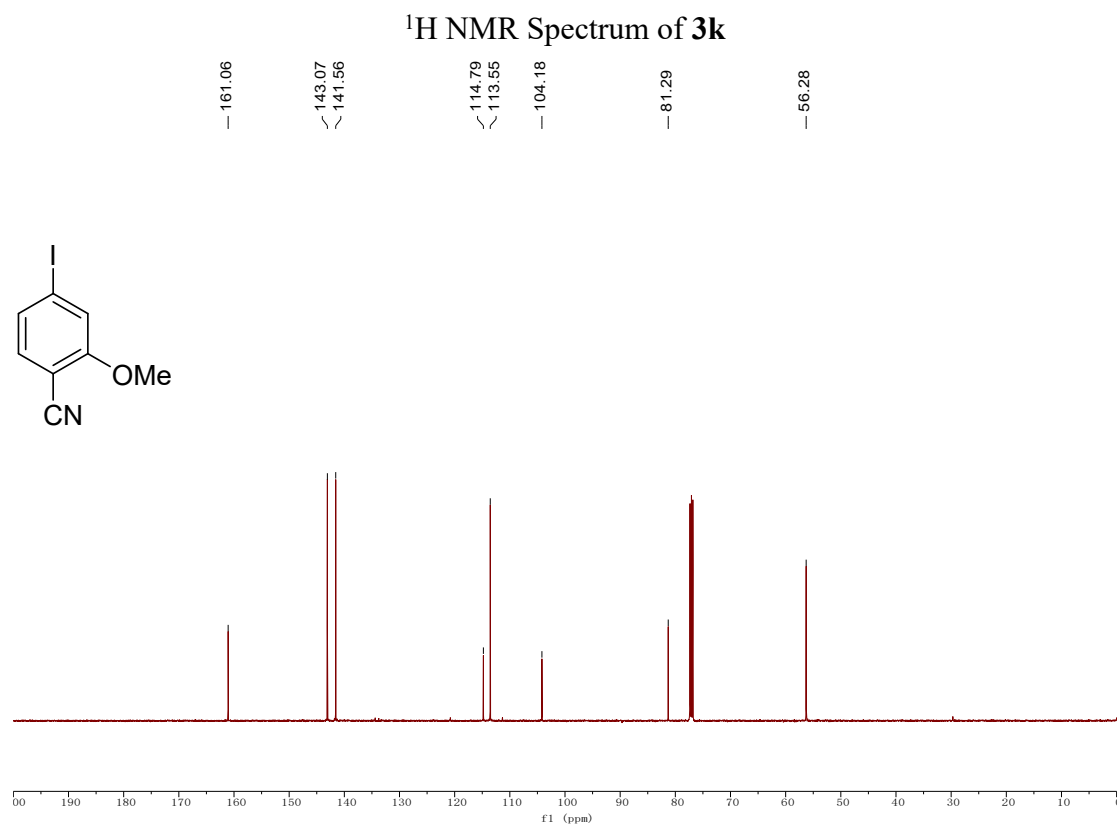

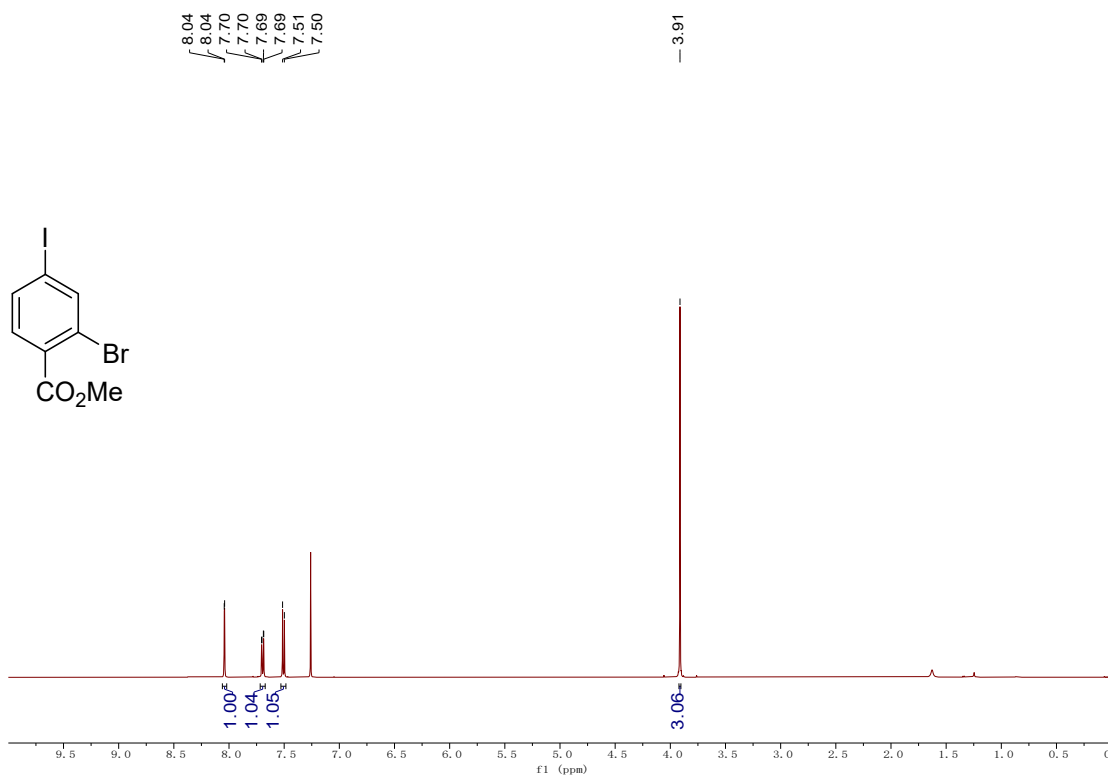

<sup>1</sup>H NMR Spectrum of **31**

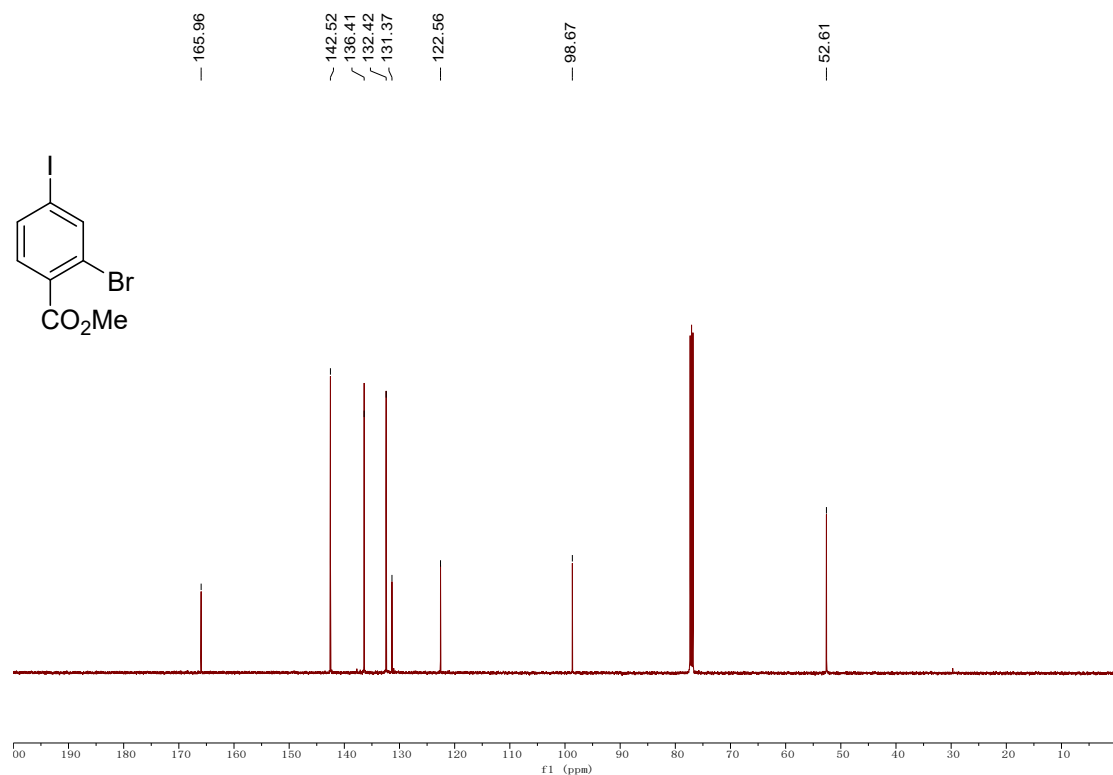

<sup>13</sup>C NMR Spectrum of **31**

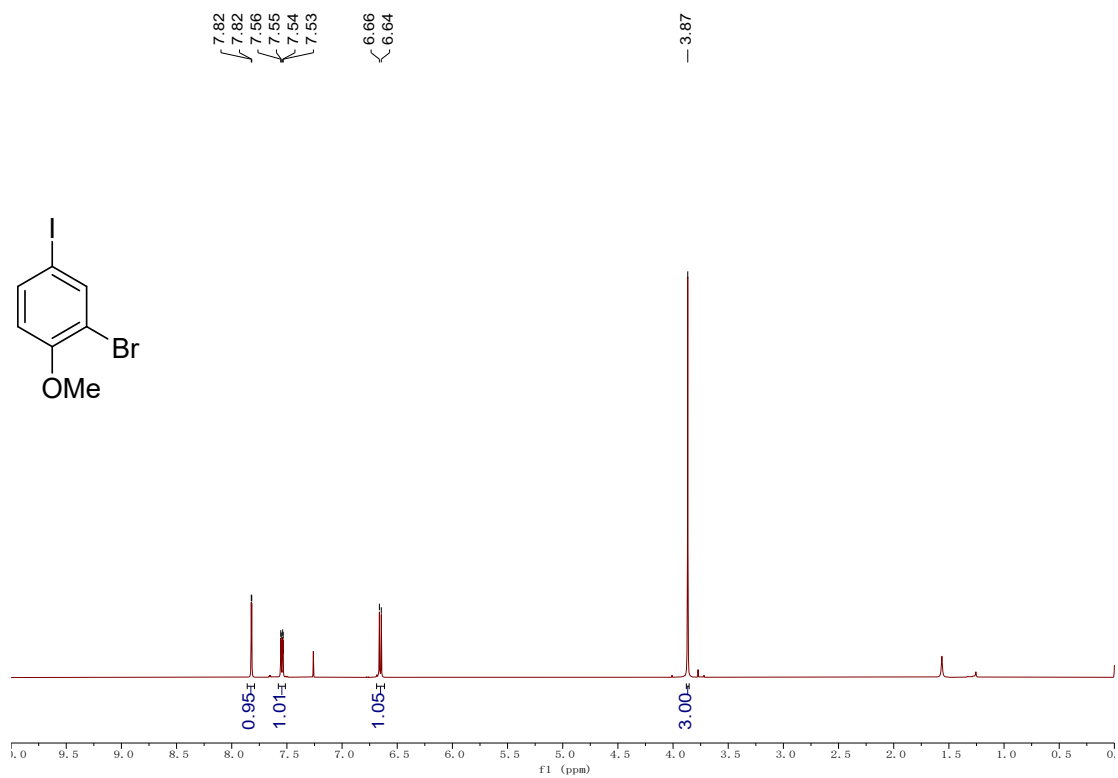

$^1\text{H}$  NMR Spectrum of **3m**

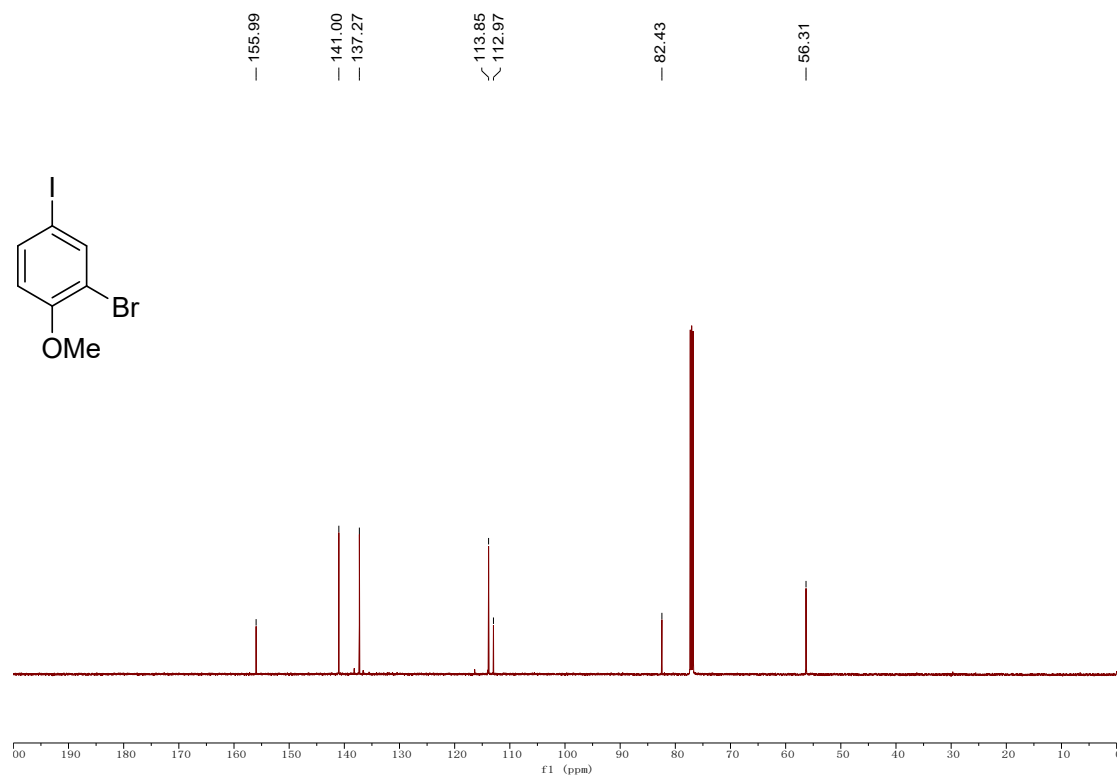

$^{13}\text{C}$  NMR Spectrum of **3m**



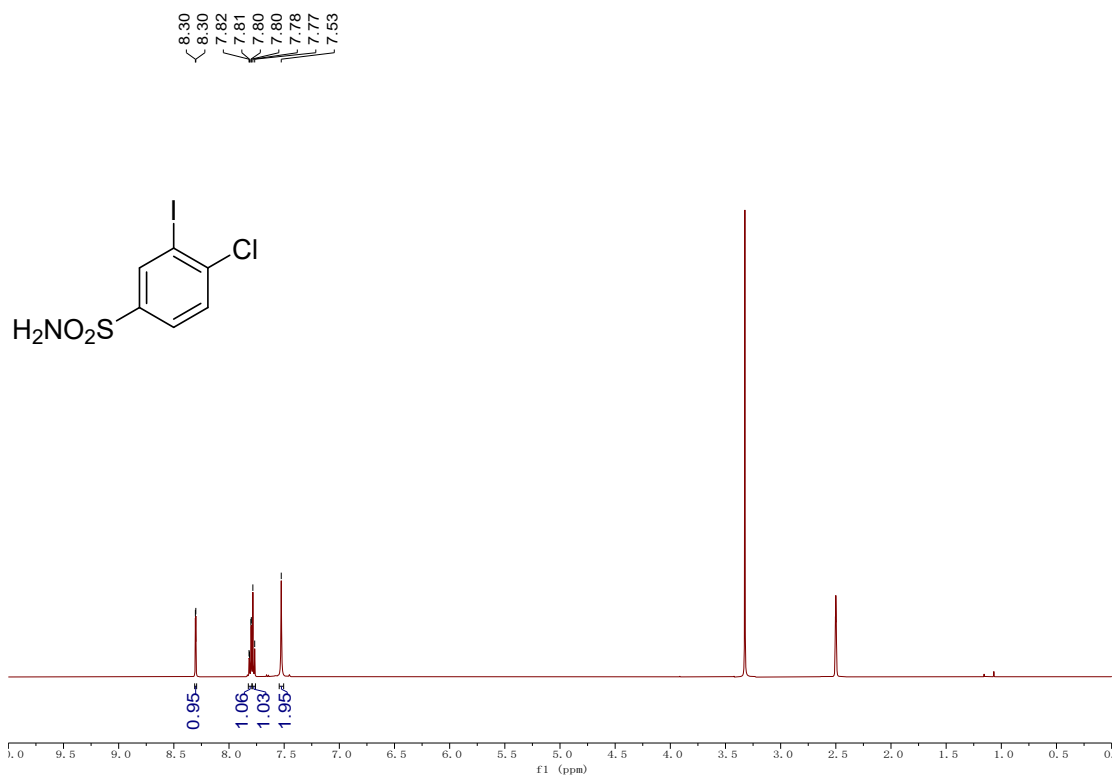

<sup>1</sup>H NMR Spectrum of **3n**

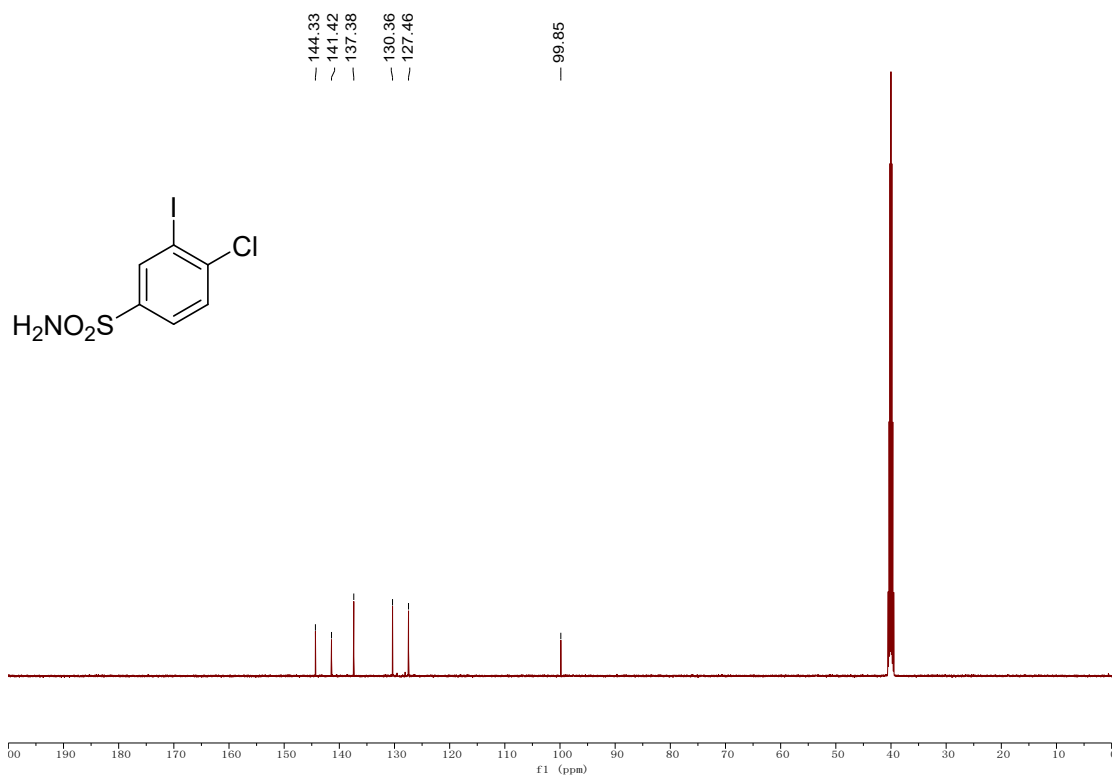

<sup>13</sup>C NMR Spectrum of **3n**

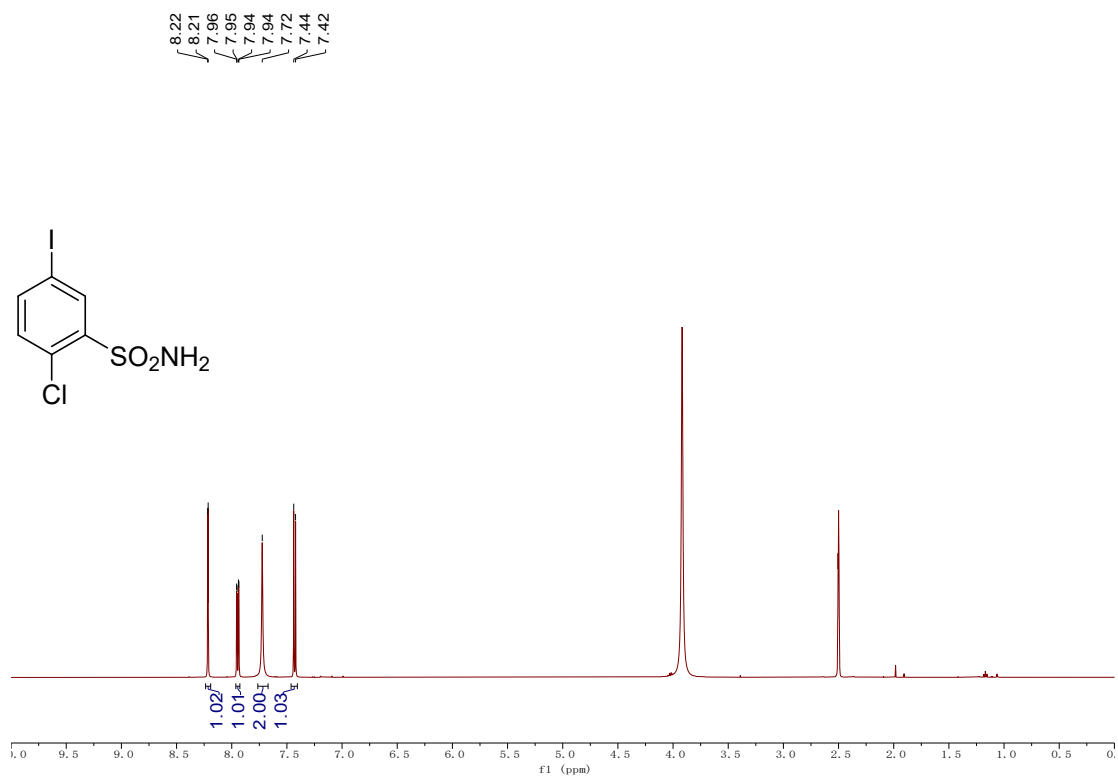

<sup>1</sup>H NMR Spectrum of **3o**

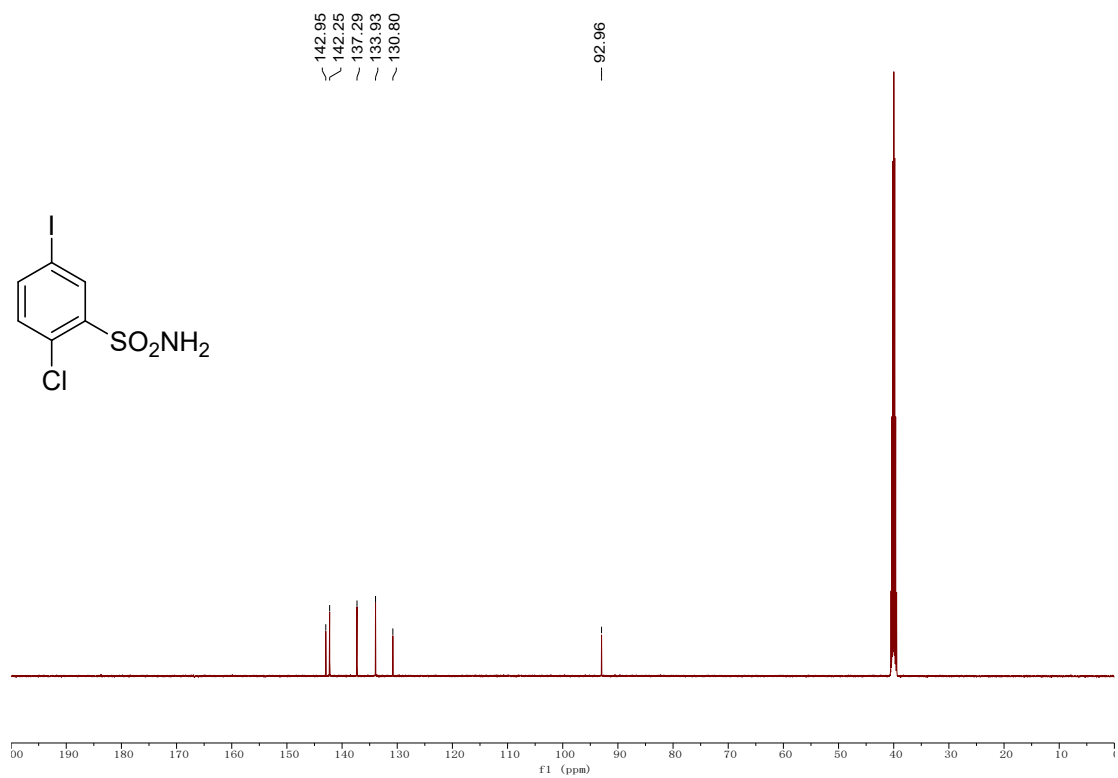

<sup>13</sup>C NMR Spectrum of **3o**

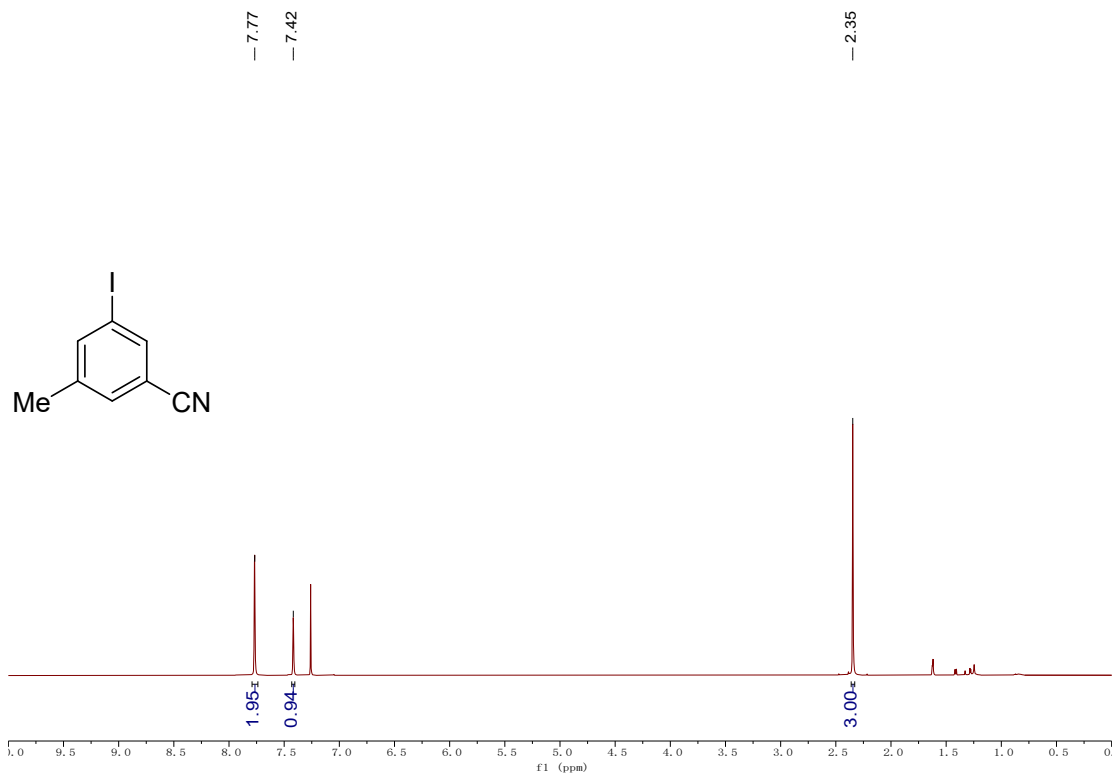

**<sup>1</sup>H NMR Spectrum of 3p**

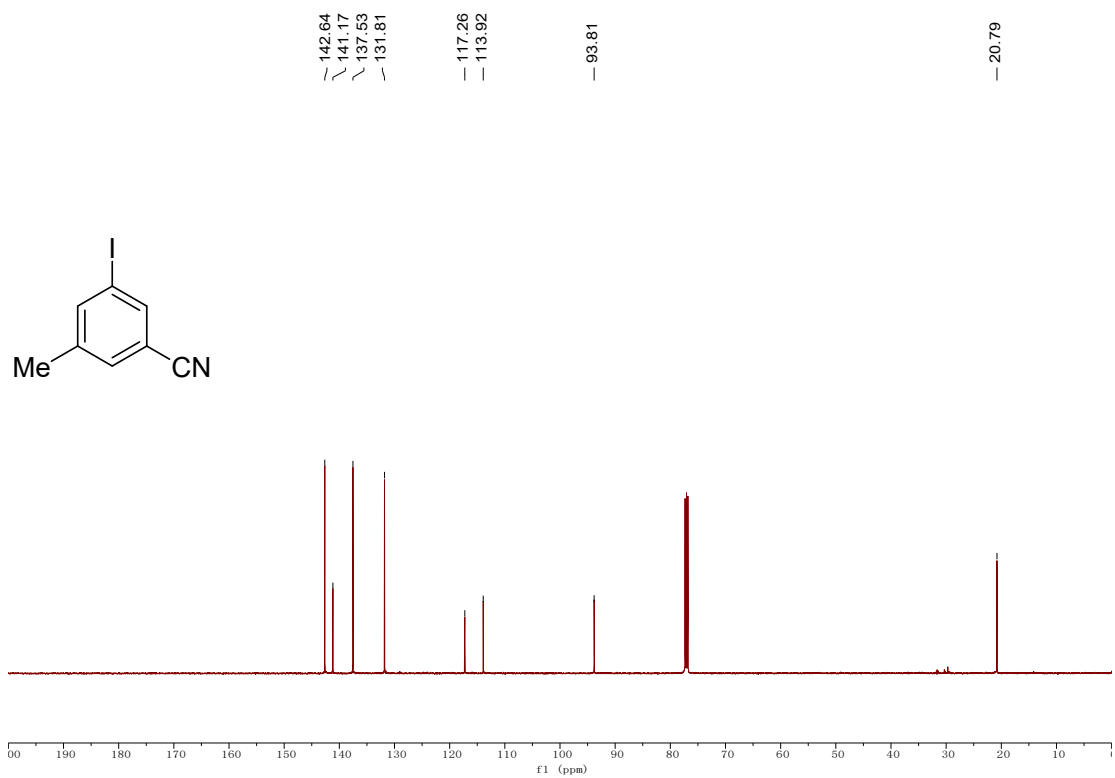

**<sup>13</sup>C NMR Spectrum of 3p**

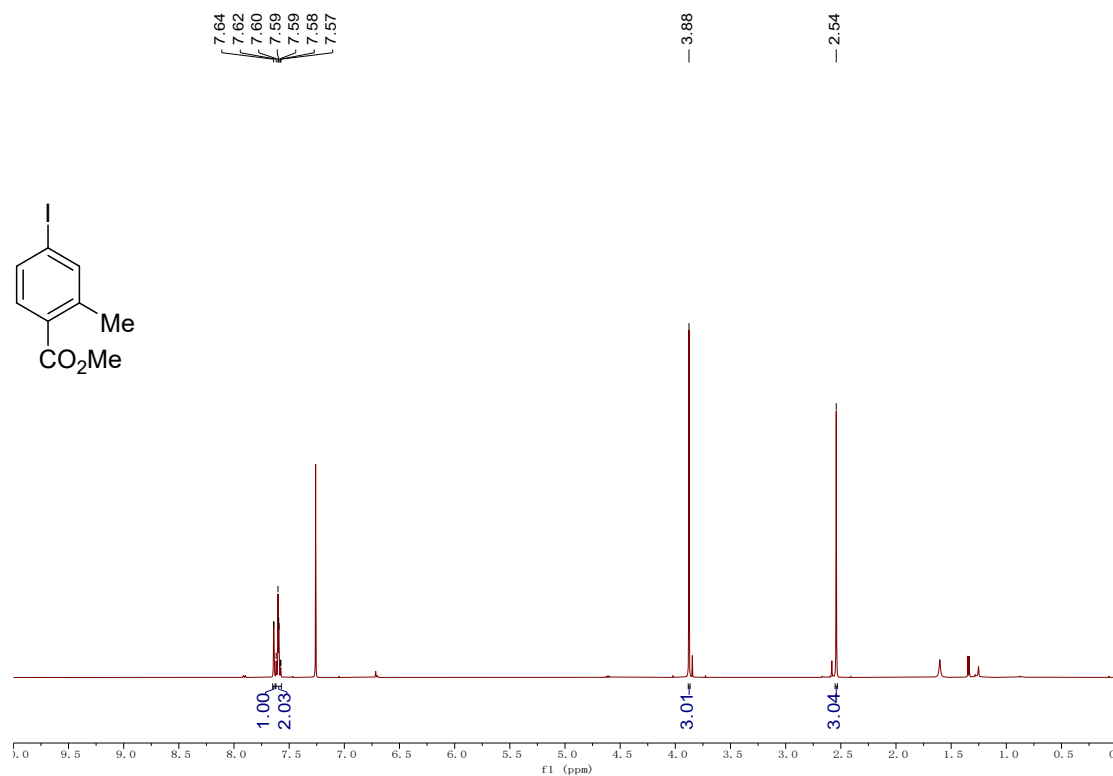

<sup>1</sup>H NMR Spectrum of 3q

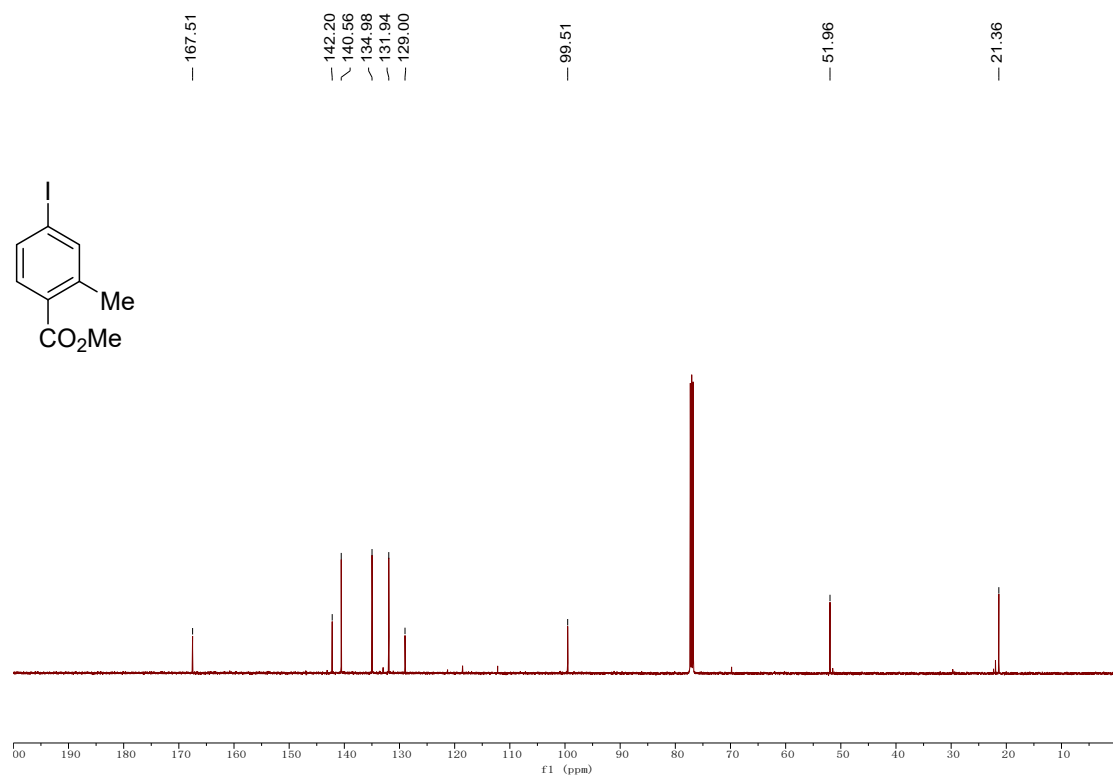

<sup>13</sup>C NMR Spectrum of 3q

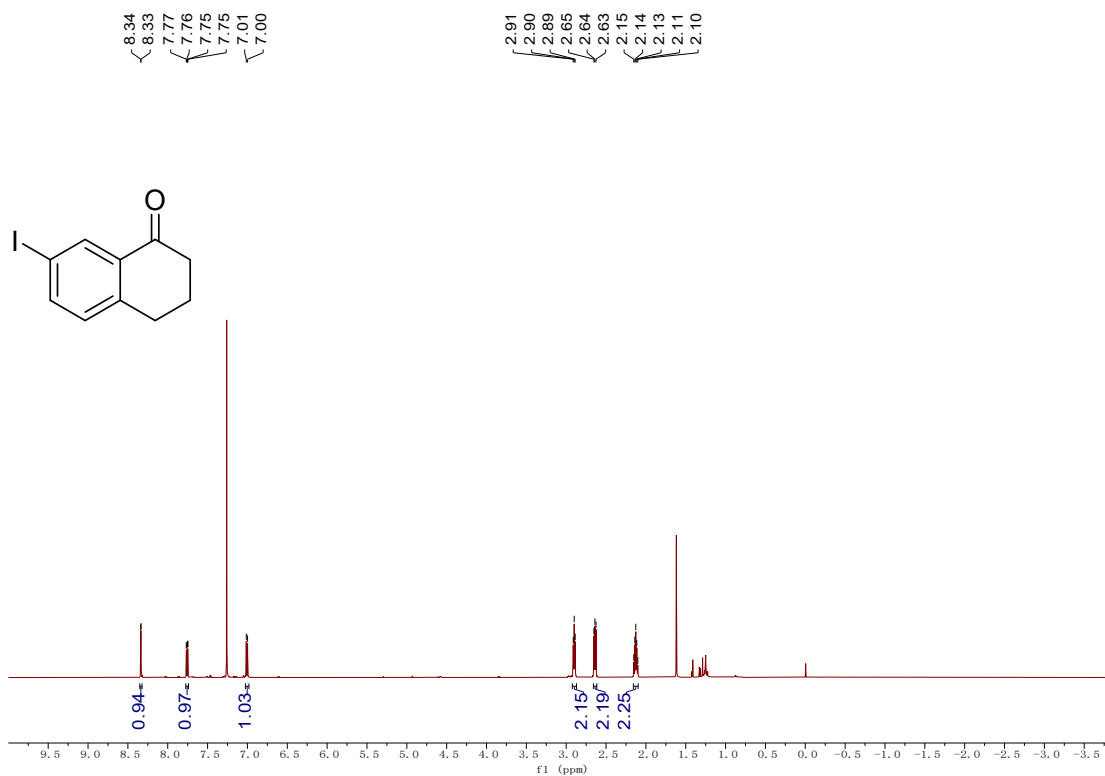

<sup>1</sup>H NMR Spectrum of 3r

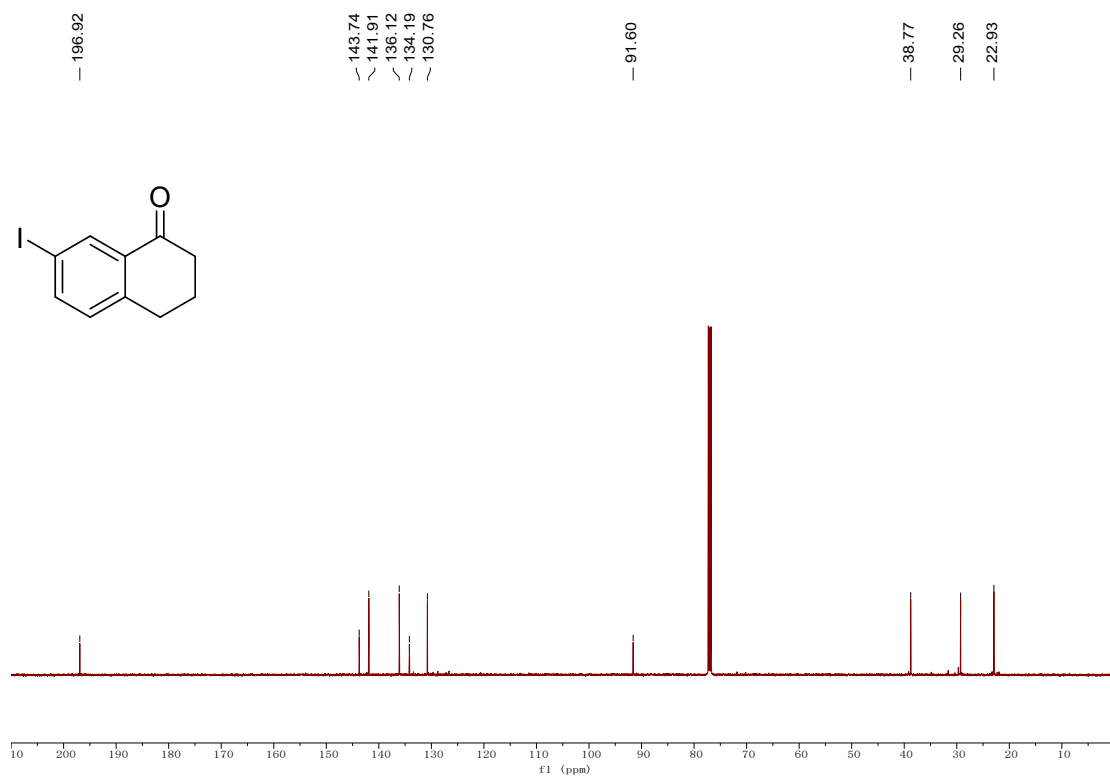

<sup>13</sup>C NMR Spectrum of 3r

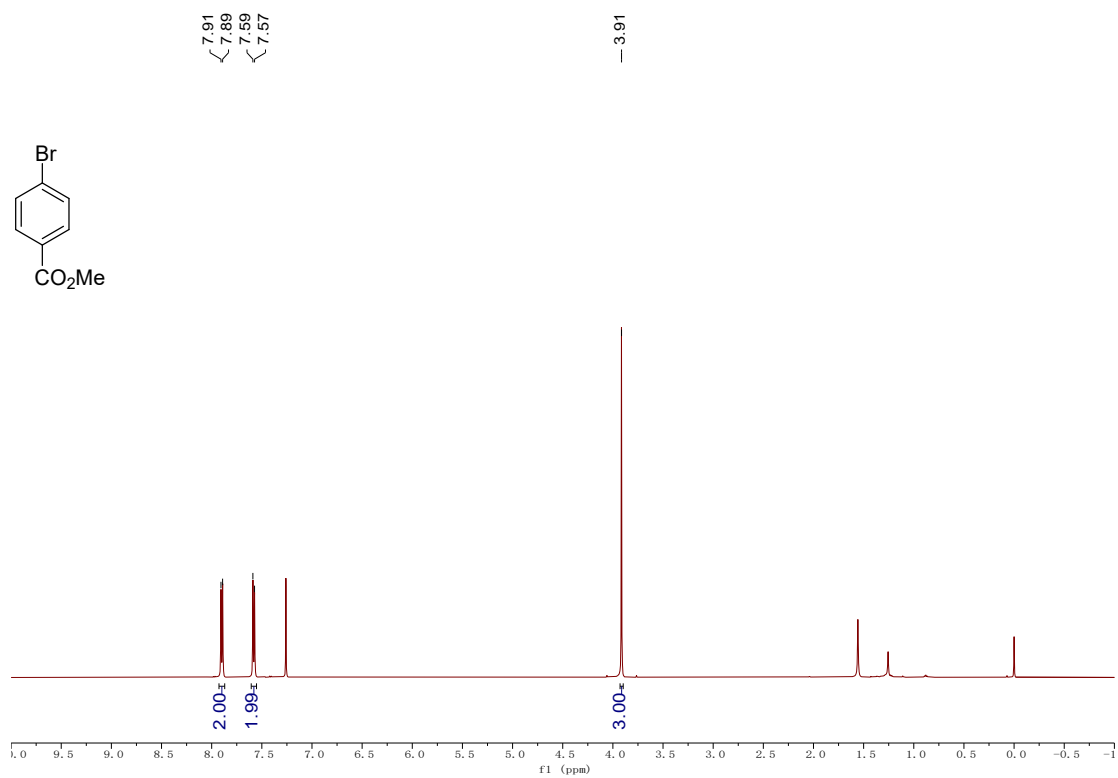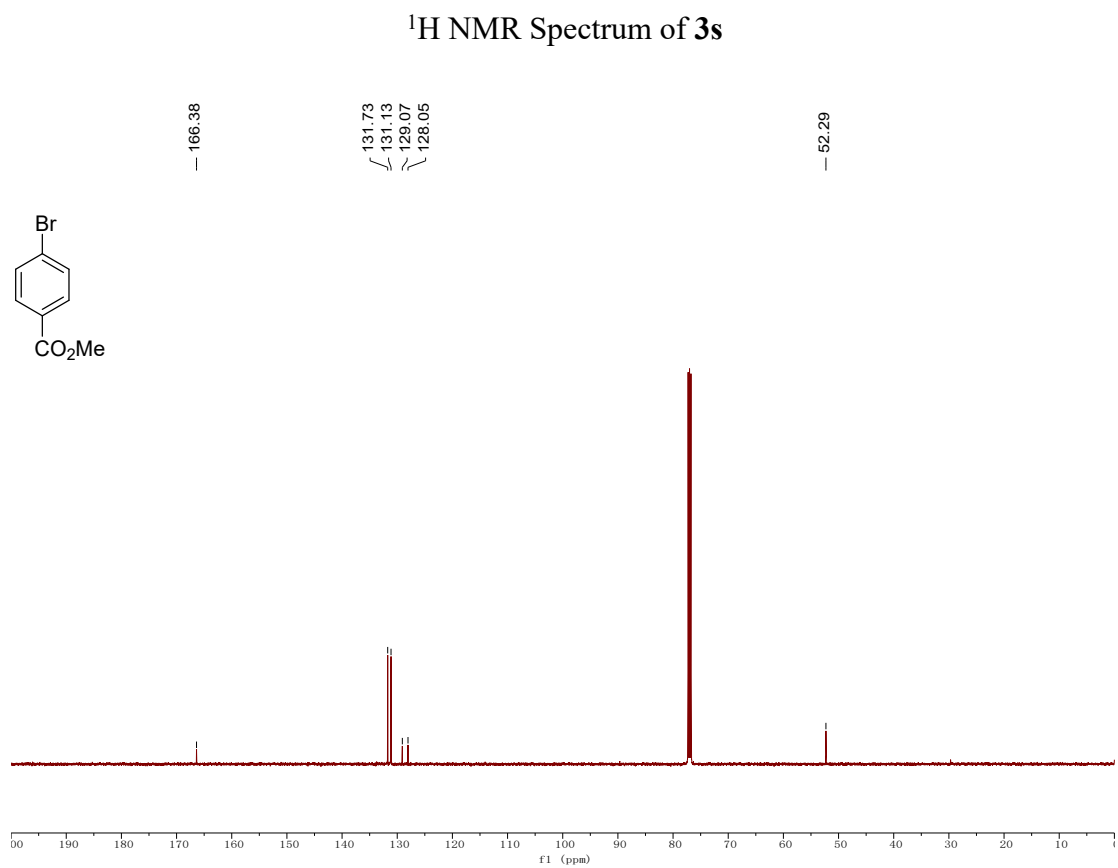

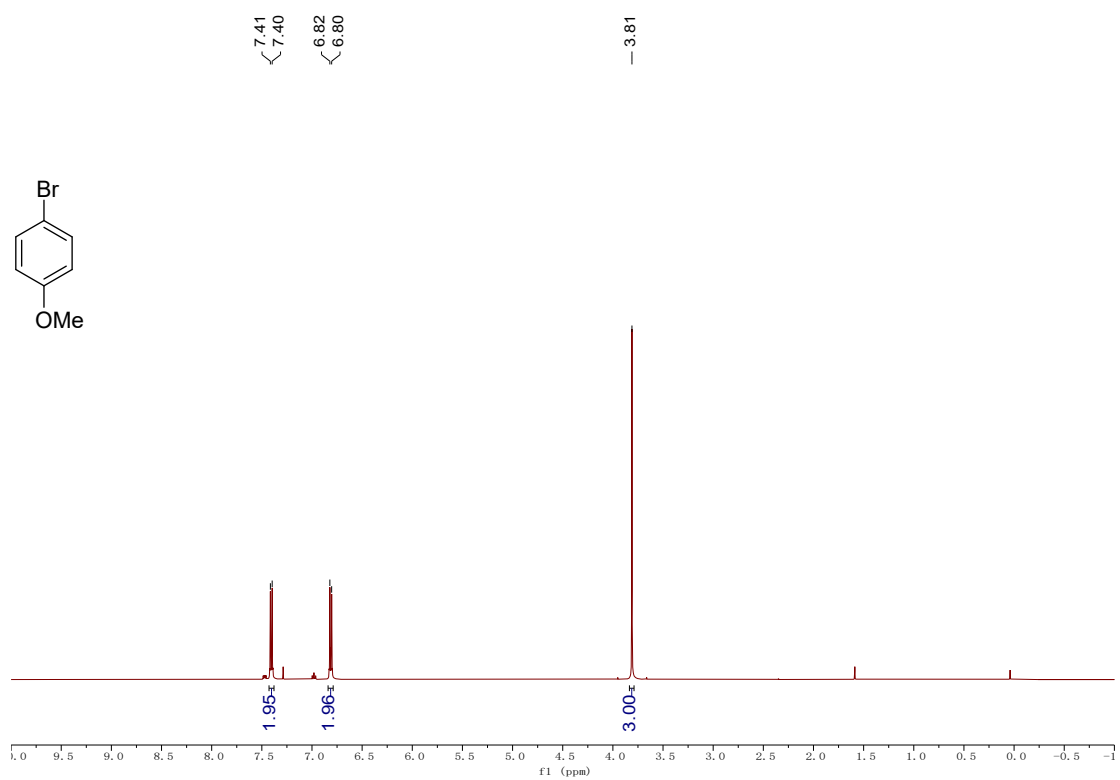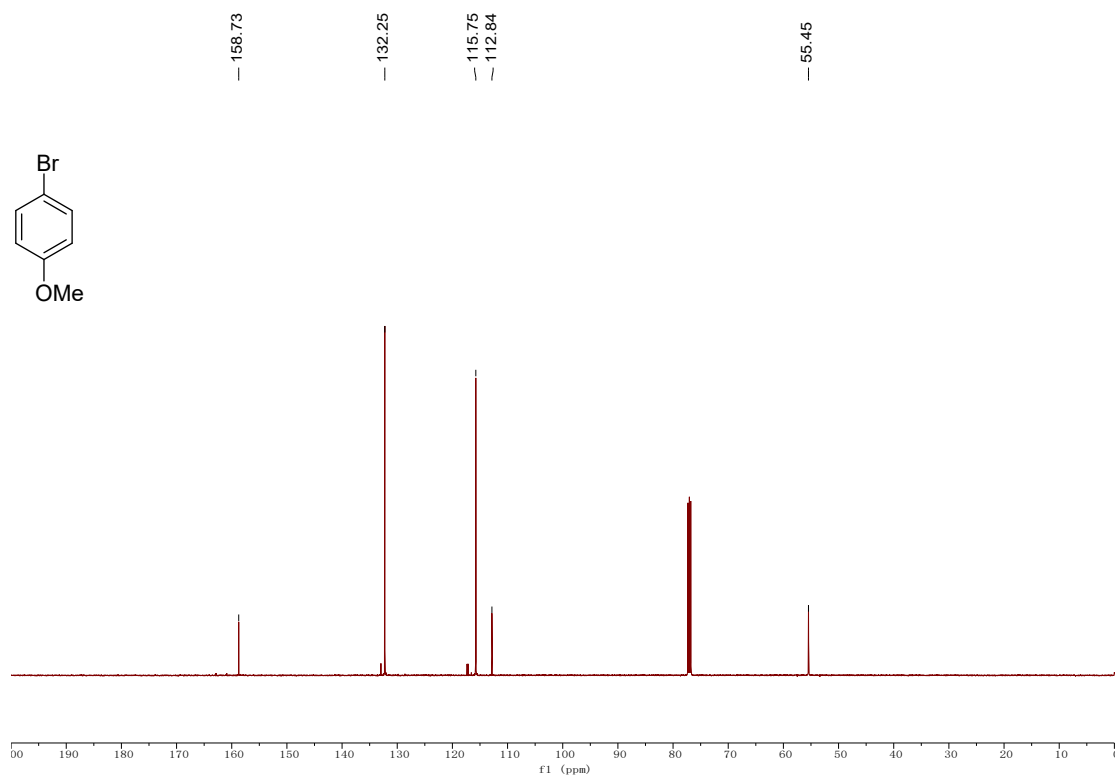

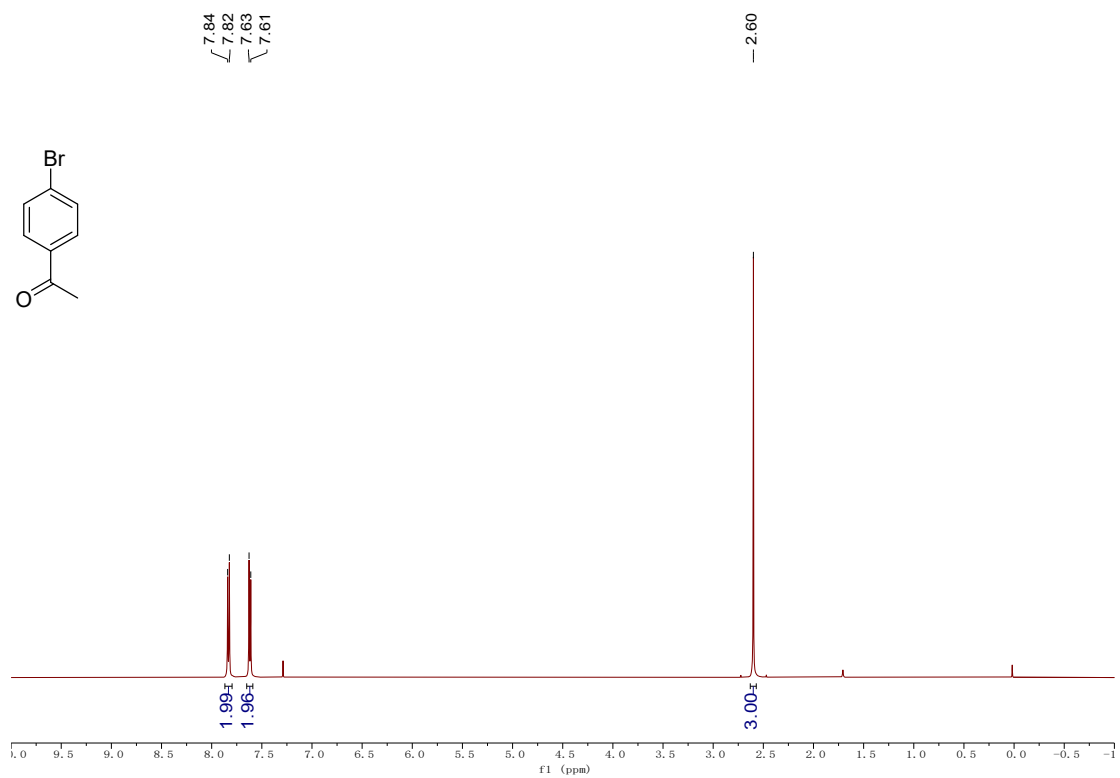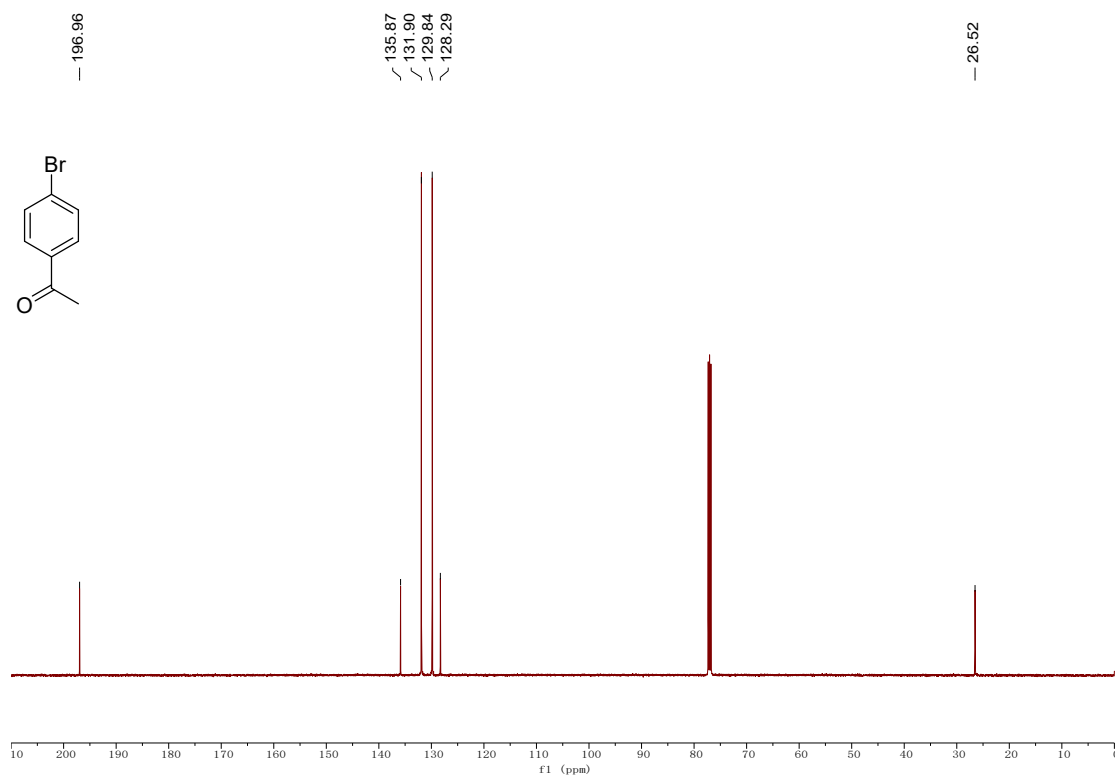





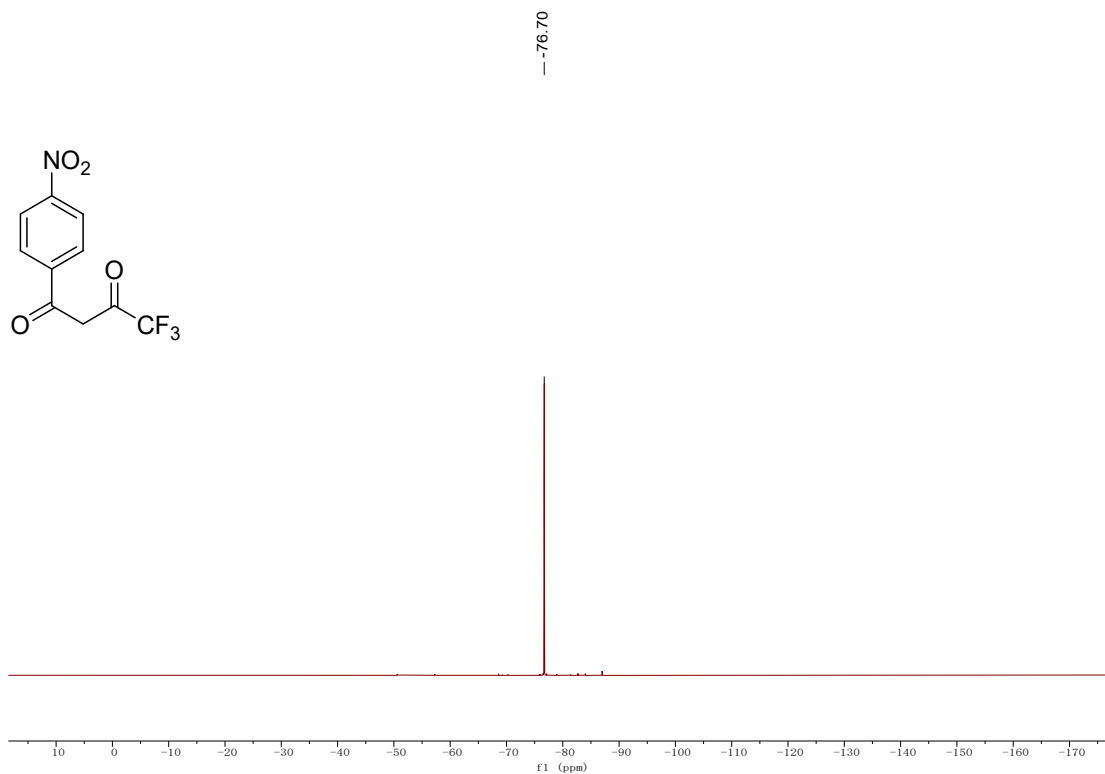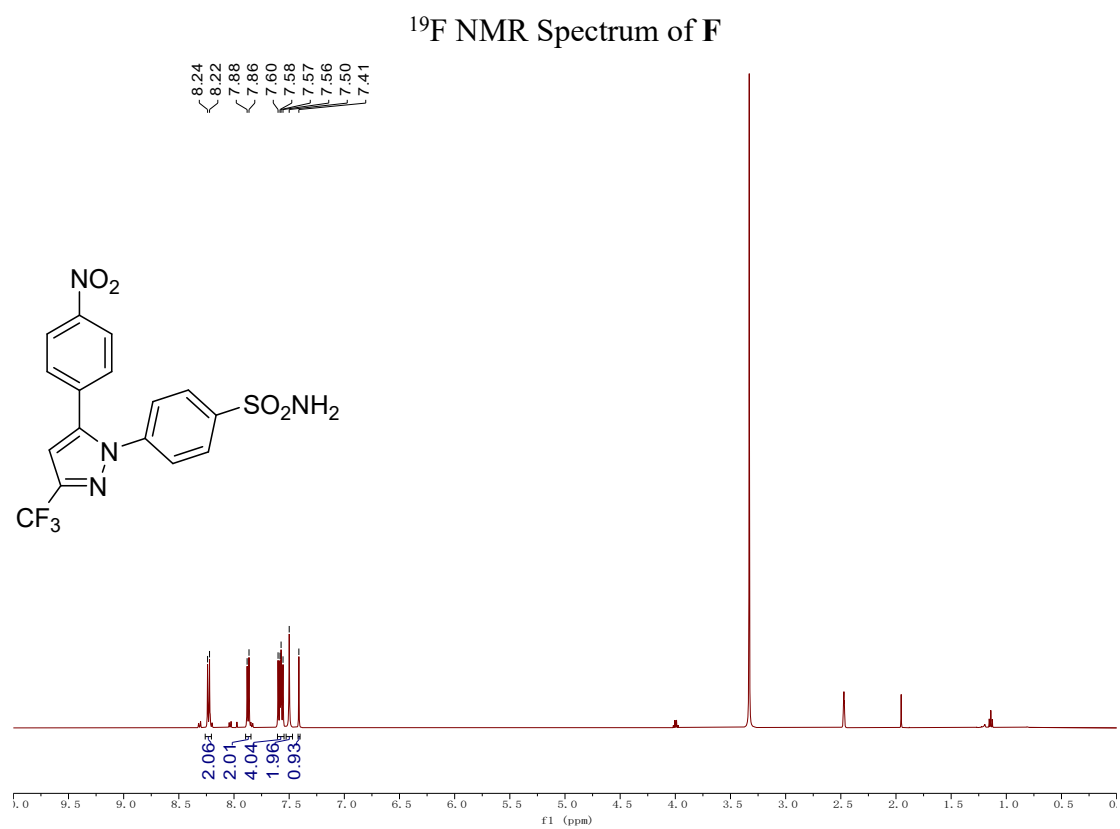

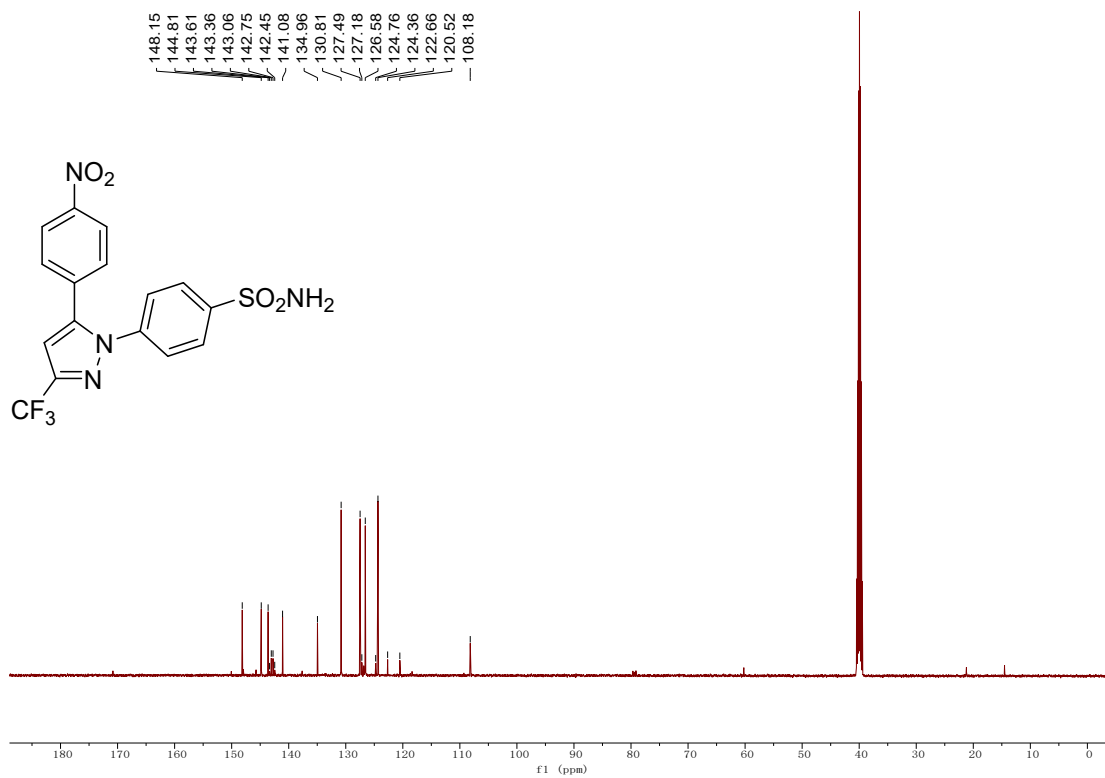

<sup>13</sup>C NMR Spectrum of 4

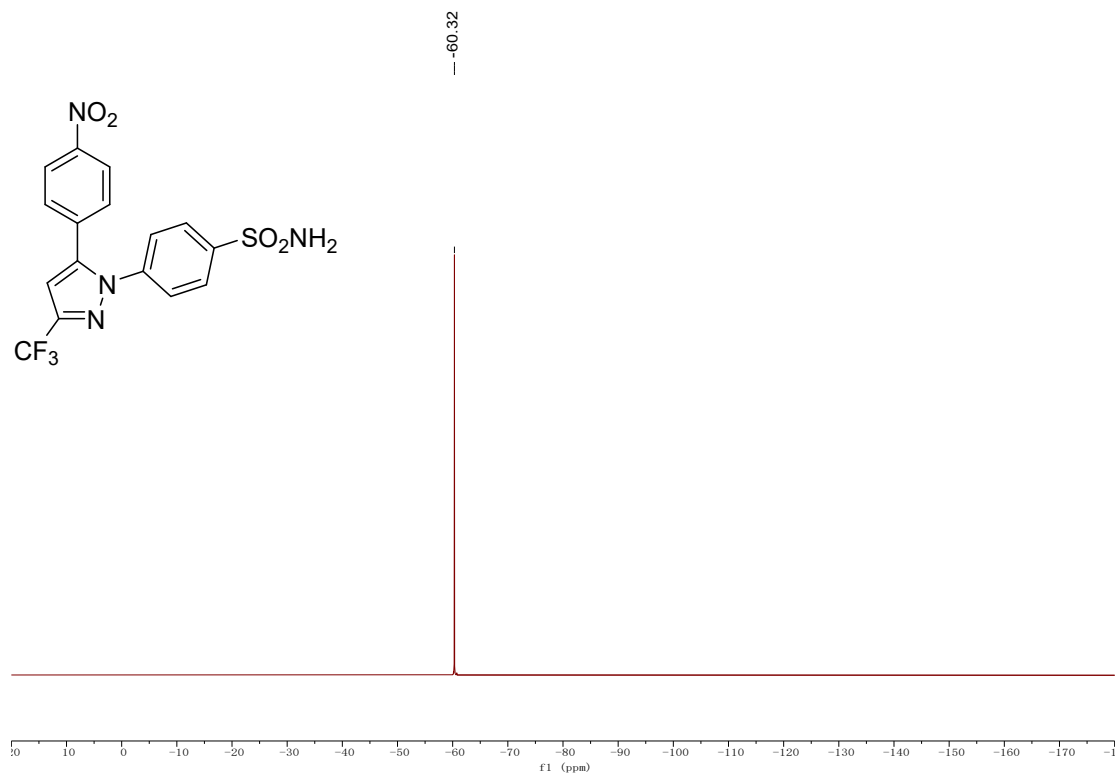

<sup>19</sup>F NMR Spectrum of 4

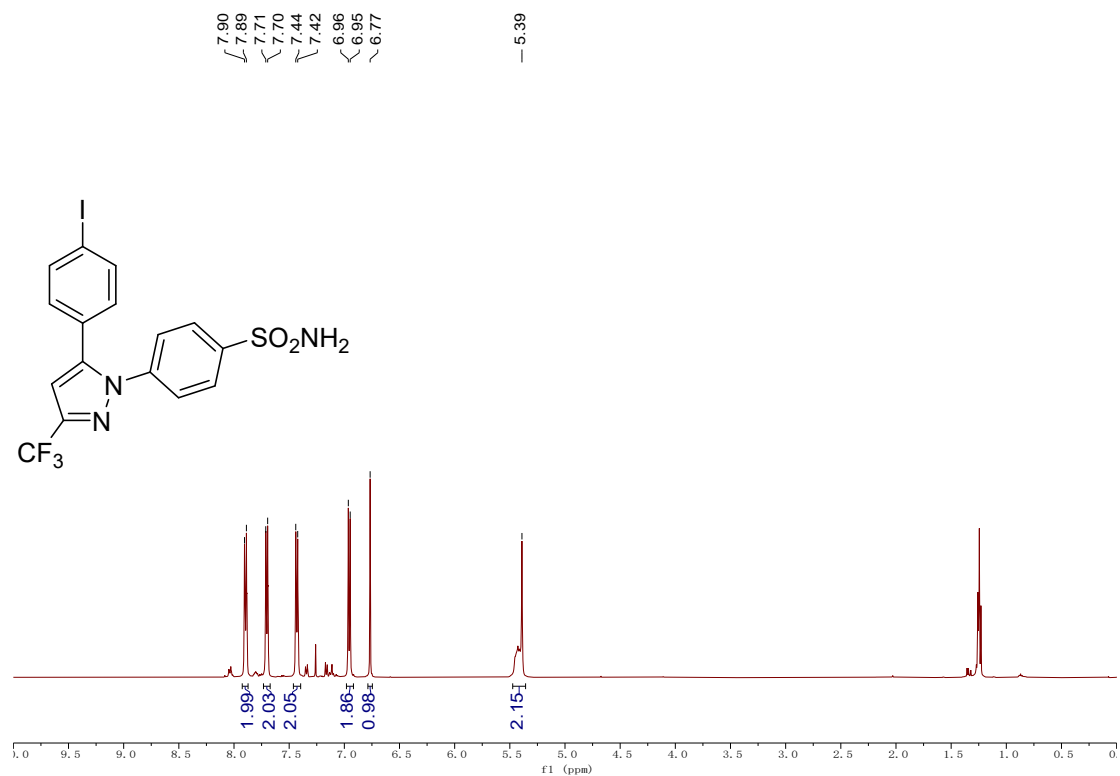

<sup>1</sup>H NMR Spectrum of **5**

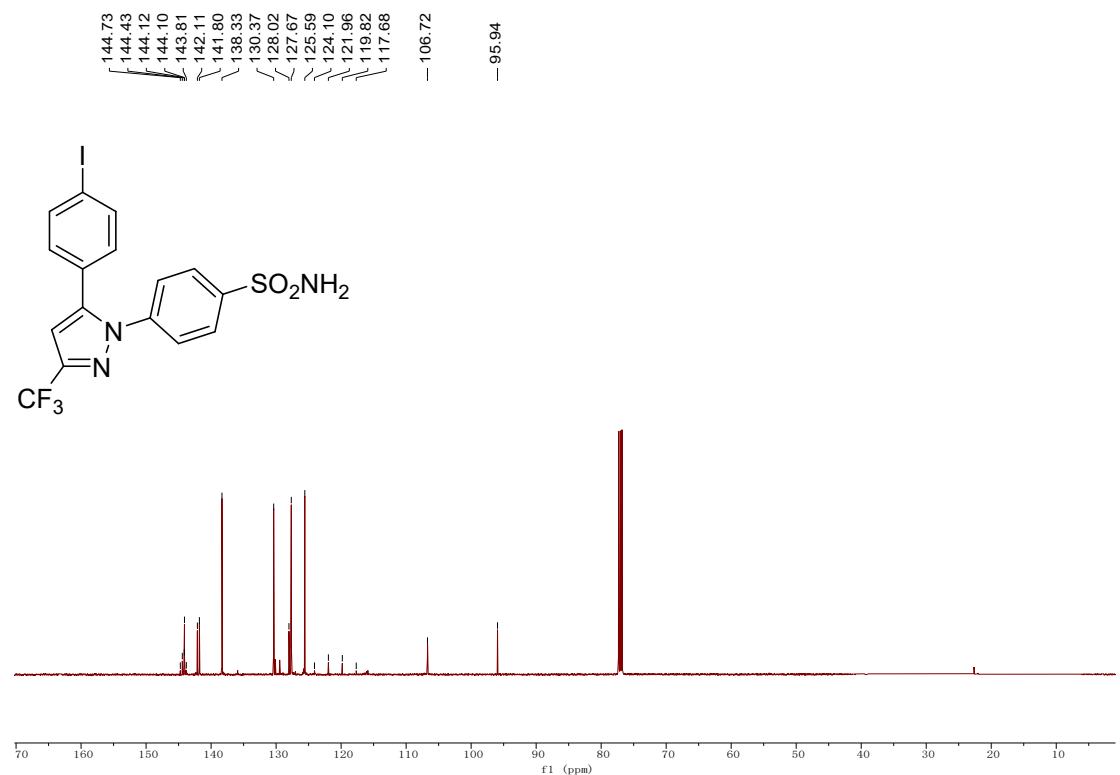

<sup>13</sup>C NMR Spectrum of **5**

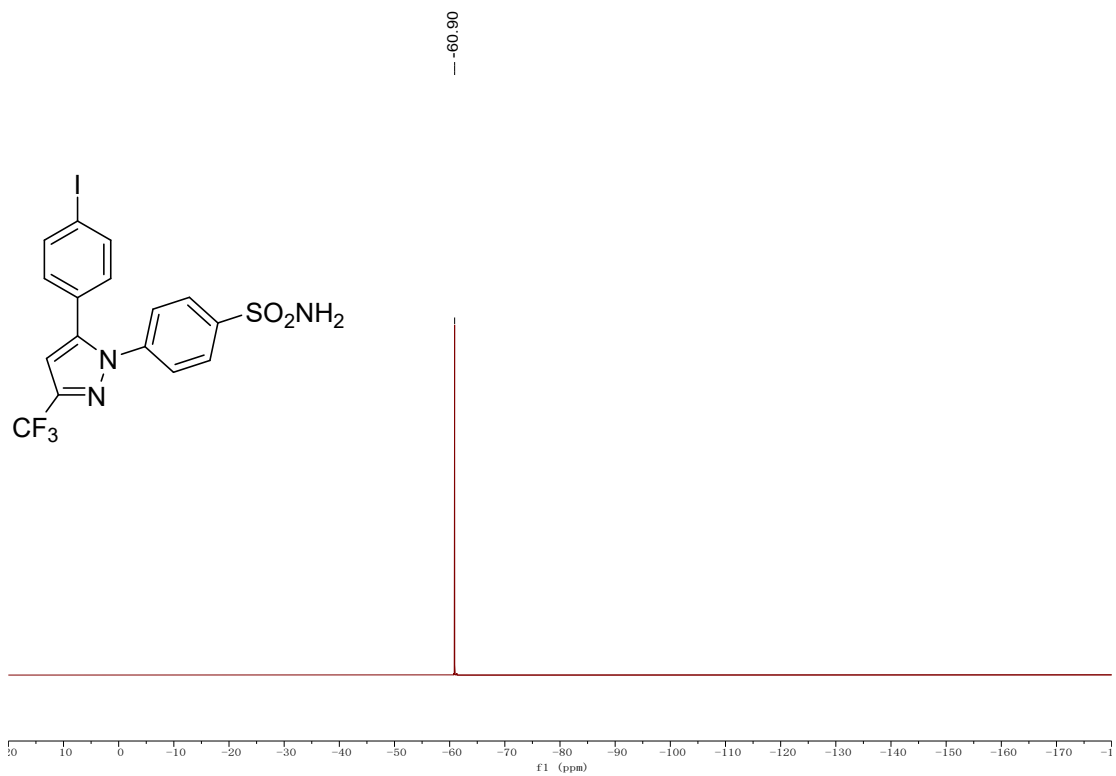

## 6. References

1. H.-S. Bao and L.-F. Wang, *Org. Lett.*, 2023, **25**, 8872–8876.
2. S. Andrejčák , P. Kisszékelyi, M. Májek, and R. Šebesta, *Eur. J. Org. Chem.*, 2023, **26**, e202201399.
3. S. S. Gholap, *Lett. Org. Chem.*, 2018, **15**, 594-599.
